# Supplementary material for: Comment on ‘YcgC represents a new protein deacetylase family in prokaryotes’
Source: eLife. 2018 Jun 25;7:e37798. doi: 10.7554/eLife.37798 (PMC6023612; doi:10.7554/eLife.37798)
Supplement: Supplementary file 1. [file elife-37798-supp1.xlsx]

## Sheet: Tabelle1
				IBAQ (log 10)
Protein IDs	Majority protein IDs	Protein names	Gene names	iBAQ ArgC	iBAQ YcgC Kremer et al.	iBAQ YcgCS200A Tu	iBAQ YcG Tu et. Al
P37349	P37349	PTS-dependent dihydroxyacetone kinase, phosphotransferase subunit DhaM;Phosphocarrier protein HPr;Phosphotransferase enzyme IIA component	dhaM	NaN	10.3502	10.5136	10.3604
P00350	P00350	6-phosphogluconate dehydrogenase, decarboxylating	gnd	NaN	7.35193	NaN	NaN
P00370	P00370	NADP-specific glutamate dehydrogenase	gdhA	NaN	6.44326	NaN	NaN
P00393	P00393	NADH dehydrogenase	ndh	NaN	NaN	7.18435	6.9359
P00509	P00509	Aspartate aminotransferase	aspC	NaN	7.05473	NaN	NaN
P00550	P00550	PTS system mannitol-specific EIICBA component;Mannitol permease IIC component;Mannitol-specific phosphotransferase enzyme IIB component;Mannitol-specific phosphotransferase enzyme IIA component	mtlA	NaN	NaN	5.7839	6.04763
P00561	P00561	Bifunctional aspartokinase/homoserine dehydrogenase 1;Aspartokinase;Homoserine dehydrogenase	thrA	NaN	NaN	5.05365	5.52727
P00562	P00562	Bifunctional aspartokinase/homoserine dehydrogenase 2;Aspartokinase;Homoserine dehydrogenase	metL	NaN	NaN	6.06711	5.61731
P00582	P00582	DNA polymerase I	polA	NaN	5.59333	NaN	6.07555
P00722	P00722	Beta-galactosidase	lacZ	NaN	7.07339	4.97372	5.80682
P00861	P00861	Diaminopimelate decarboxylase	lysA	NaN	NaN	6.78209	NaN
P00956	P00956	Isoleucine--tRNA ligase	ileS	NaN	8.02181	NaN	NaN
P00957	P00957	Alanine--tRNA ligase	alaS	NaN	8.58549	6.44242	6.82278
P00959	P00959	Methionine--tRNA ligase	metG	NaN	7.82188	NaN	5.62752
P00961	P00961	Glycine--tRNA ligase beta subunit	glyS	NaN	4.98787	NaN	7.16277
P00968	P00968	Carbamoyl-phosphate synthase large chain	carB	NaN	6.47532	NaN	NaN
P02358	P02358	30S ribosomal protein S6;30S ribosomal protein S6, fully modified isoform;30S ribosomal protein S6, non-modified isoform	rpsF	NaN	7.85784	6.88506	8.18792
P02359	P02359	30S ribosomal protein S7	rpsG	NaN	8.74093	6.70847	7.11574
P02413	P02413	50S ribosomal protein L15	rplO	NaN	7.24	8.22837	8.28224
P02919	P02919	Penicillin-binding protein 1B;Penicillin-insensitive transglycosylase;Penicillin-sensitive transpeptidase	mrcB	NaN	NaN	5.67197	5.99689
P02931	P02931	Outer membrane protein F	ompF	NaN	6.63127	NaN	6.50183
P03023	P03023	Lactose operon repressor	lacI	NaN	7.46315	NaN	7.16599
P04036	P04036	4-hydroxy-tetrahydrodipicolinate reductase	dapB	NaN	6.28556	NaN	NaN
P04079	P04079	GMP synthase [glutamine-hydrolyzing]	guaA	NaN	7.96405	6.86707	6.85091
P04425	P04425	Glutathione synthetase	gshB	NaN	7.02185	NaN	NaN
P04805	P04805	Glutamate--tRNA ligase	gltX	NaN	NaN	7.19365	NaN
P04825	P04825	Aminopeptidase N	pepN	NaN	6.70568	NaN	NaN
P04983	P04983	Ribose import ATP-binding protein RbsA	rbsA	NaN	NaN	5.64729	NaN
P05042	P05042	Fumarate hydratase class II	fumC	NaN	7.68604	5.09181	NaN
P05055	P05055	Polyribonucleotide nucleotidyltransferase	pnp	NaN	8.71625	NaN	7.34832
P05706	P05706	Glucitol/sorbitol-specific phosphotransferase enzyme IIA component	srlB	NaN	NaN	6.06021	NaN
P05791	P05791	Dihydroxy-acid dehydratase	ilvD	NaN	6.37891	4.47871	NaN
P05793	P05793	Ketol-acid reductoisomerase	ilvC	NaN	7.91416	NaN	NaN
P05852	P05852	tRNA N6-adenosine threonylcarbamoyltransferase	tsaD	NaN	NaN	5.47956	NaN
P06136	P06136	Cell division protein FtsQ	ftsQ	NaN	NaN	6.47095	NaN
P06149	P06149	D-lactate dehydrogenase	dld	NaN	NaN	6.43422	6.59509
P06282	P06282	CDP-diacylglycerol pyrophosphatase	cdh	NaN	NaN	5.74828	NaN
P06612	P06612	DNA topoisomerase 1	topA	NaN	5.45498	NaN	NaN
P06616	P06616	GTPase Era	era	NaN	NaN	6.87845	5.71405
P06710	P06710	DNA polymerase III subunit tau	dnaX	NaN	NaN	6.73748	NaN
P06720	P06720	Alpha-galactosidase	melA	NaN	8.49726	NaN	NaN
P06721	P06721	Cystathionine beta-lyase MetC	metC	NaN	6.67814	NaN	NaN
P06959	P06959	Dihydrolipoyllysine-residue acetyltransferase component of pyruvate dehydrogenase complex	aceF	NaN	6.8993	NaN	7.19714
P06987	P06987	Histidine biosynthesis bifunctional protein HisB;Histidinol-phosphatase;Imidazoleglycerol-phosphate dehydratase	hisB	NaN	7.06618	6.76995	7.19019
P07001	P07001	NAD(P) transhydrogenase subunit alpha	pntA	NaN	NaN	6.10185	6.55698
P07004	P07004	Gamma-glutamyl phosphate reductase	proA	NaN	7.56464	NaN	NaN
P07012	P07012	Peptide chain release factor 2	prfB	NaN	NaN	6.97986	6.50198
P07014	P07014	Succinate dehydrogenase iron-sulfur subunit	sdhB	NaN	6.75489	NaN	7.48739
P07109	P07109	Histidine transport ATP-binding protein HisP	hisP	NaN	NaN	7.62401	NaN
P07117	P07117	Sodium/proline symporter	putP	NaN	NaN	7.37776	NaN
P07118	P07118	Valine--tRNA ligase	valS	NaN	7.96803	NaN	NaN
P07330	P07330	Chemotaxis response regulator protein-glutamate methylesterase	cheB	NaN	NaN	6.15214	NaN
P07395	P07395	Phenylalanine--tRNA ligase beta subunit	pheT	NaN	8.35318	NaN	6.00069
P07464	P07464	Galactoside O-acetyltransferase	lacA	NaN	NaN	7.08235	NaN
P07813	P07813	Leucine--tRNA ligase	leuS	NaN	7.88507	NaN	4.929
P07913	P07913	L-threonine 3-dehydrogenase	tdh	NaN	7.87646	6.7198	5.92831
P08192	P08192	Bifunctional protein FolC;Folylpolyglutamate synthase;Dihydrofolate synthase	folC	NaN	NaN	6.43586	6.74323
P08200	P08200	Isocitrate dehydrogenase [NADP]	icd	NaN	7.58328	7.68653	6.88095
P08312	P08312	Phenylalanine--tRNA ligase alpha subunit	pheS	NaN	8.39644	NaN	5.85654
P08390	P08390	USG-1 protein	usg	NaN	7.69289	NaN	NaN
P08622	P08622	Chaperone protein DnaJ	dnaJ	NaN	6.33732	8.0505	7.52418
P08839;P77439;P32670	P08839	Phosphoenolpyruvate-protein phosphotransferase	ptsI	NaN	8.05953	5.54189	7.66927
P08957	P08957	Type I restriction enzyme EcoKI M protein	hsdM	NaN	NaN	6.08764	6.03914
P08997	P08997	Malate synthase A	aceB	NaN	6.2033	NaN	NaN
P09030	P09030	Exodeoxyribonuclease III	xthA	NaN	NaN	6.09805	NaN
P09053	P09053	Valine--pyruvate aminotransferase	avtA	NaN	NaN	6.48284	5.73556
P09372;REV__P22106	P09372	Protein GrpE	grpE	NaN	9.12359	6.29219	7.93765
P09373;P68066	P09373	Formate acetyltransferase 1	pflB	NaN	8.72498	NaN	6.98598
P09546	P09546	Bifunctional protein PutA;Proline dehydrogenase;Delta-1-pyrroline-5-carboxylate dehydrogenase	putA	NaN	5.50414	NaN	6.35372
P09549	P09549	Cell division protein DedD	dedD	NaN	NaN	6.77533	NaN
P09832	P09832	Glutamate synthase [NADPH] small chain	gltD	NaN	NaN	4.85973	5.68889
P0A6A3	P0A6A3	Acetate kinase	ackA	NaN	NaN	5.65941	NaN
P0A6A8	P0A6A8	Acyl carrier protein	acpP	NaN	NaN	7.95389	8.48785
P0A6B7	P0A6B7	Cysteine desulfurase IscS	iscS	NaN	6.71658	7.54469	7.53613
P0A6C5	P0A6C5	Amino-acid acetyltransferase	argA	NaN	NaN	5.46817	NaN
P0A6E4	P0A6E4	Argininosuccinate synthase	argG	NaN	6.63315	NaN	NaN
P0A6F1	P0A6F1	Carbamoyl-phosphate synthase small chain	carA	NaN	6.36301	NaN	NaN
P0A6F5	P0A6F5	60 kDa chaperonin	groL	NaN	8.29702	6.57816	7.61202
P0A6F9	P0A6F9	10 kDa chaperonin	groS	NaN	8.0975	NaN	6.80641
P0A6G7	P0A6G7	ATP-dependent Clp protease proteolytic subunit	clpP	NaN	7.98441	NaN	NaN
P0A6H1	P0A6H1	ATP-dependent Clp protease ATP-binding subunit ClpX	clpX	NaN	6.42653	6.55569	7.38645
P0A6H5	P0A6H5	ATP-dependent protease ATPase subunit HslU	hslU	NaN	6.18409	7.00191	7.42602
P0A6J1	P0A6J1	Adenylyl-sulfate kinase	cysC	NaN	NaN	7.37114	6.98799
P0A6J5	P0A6J5	D-amino acid dehydrogenase	dadA	NaN	NaN	5.92368	6.86395
P0A6K1	P0A6K1	Diaminopimelate epimerase	dapF	NaN	6.20844	NaN	NaN
P0A6K6	P0A6K6	Phosphopentomutase	deoB	NaN	NaN	6.03133	5.84213
P0A6M8	P0A6M8	Elongation factor G	fusA	NaN	7.84799	NaN	8.1642
P0A6N4	P0A6N4	Elongation factor P	efp	NaN	NaN	7.48374	7.22342
P0A6P1	P0A6P1	Elongation factor Ts	tsf	NaN	7.66553	NaN	7.9788
P0A6P7	P0A6P7	Probable GTP-binding protein EngB	engB	NaN	NaN	6.47644	NaN
P0A6P9	P0A6P9	Enolase	eno	NaN	7.85845	NaN	NaN
P0A6S5	P0A6S5	Cell division protein FtsB	ftsB	NaN	NaN	7.07624	6.02181
P0A6S7	P0A6S7	Glycerol-3-phosphate dehydrogenase [NAD(P)+]	gpsA	NaN	NaN	6.27506	6.38142
P0A6T1	P0A6T1	Glucose-6-phosphate isomerase	pgi	NaN	6.28171	NaN	NaN
P0A6T5	P0A6T5	GTP cyclohydrolase 1	folE	NaN	NaN	6.93385	5.40543
P0A6V8	P0A6V8	Glucokinase	glk	NaN	NaN	6.24348	NaN
P0A6W3	P0A6W3	Phospho-N-acetylmuramoyl-pentapeptide-transferase	mraY	NaN	NaN	7.08264	NaN
P0A6X3	P0A6X3	RNA-binding protein Hfq	hfq	NaN	NaN	7.20453	6.48616
P0A6Y1	P0A6Y1	Integration host factor subunit beta	ihfB	NaN	NaN	6.95292	6.87276
P0A6Y5	P0A6Y5	33 kDa chaperonin	hslO	NaN	6.26722	6.79795	6.24986
P0A6Y8	P0A6Y8	Chaperone protein DnaK	dnaK	NaN	9.05729	8.51178	8.75119
P0A6Z1	P0A6Z1	Chaperone protein HscA	hscA	NaN	5.56572	NaN	6.48306
P0A6Z3	P0A6Z3	Chaperone protein HtpG	htpG	NaN	7.7201	NaN	7.84859
P0A6Z6	P0A6Z6	Nickel-responsive regulator	nikR	NaN	NaN	8.26496	7.62453
P0A705	P0A705	Translation initiation factor IF-2	infB	NaN	7.01414	5.35854	7.56381
P0A715	P0A715	2-dehydro-3-deoxyphosphooctonate aldolase	kdsA	NaN	5.70059	NaN	5.59014
P0A717	P0A717	Ribose-phosphate pyrophosphokinase	prs	NaN	NaN	7.33258	NaN
P0A722	P0A722	Acyl-[acyl-carrier-protein]--UDP-N-acetylglucosamine O-acyltransferase	lpxA	NaN	NaN	6.67858	NaN
P0A734	P0A734	Cell division topological specificity factor	minE	NaN	NaN	7.61734	NaN
P0A738	P0A738	Cyclic pyranopterin monophosphate synthase accessory protein	moaC	NaN	NaN	6.18755	NaN
P0A744	P0A744	Peptide methionine sulfoxide reductase MsrA	msrA	NaN	NaN	6.57216	6.79562
P0A746	P0A746	Peptide methionine sulfoxide reductase MsrB	msrB	NaN	NaN	7.25268	6.25936
P0A749	P0A749	UDP-N-acetylglucosamine 1-carboxyvinyltransferase	murA	NaN	NaN	7.22102	NaN
P0A759	P0A759	Glucosamine-6-phosphate deaminase	nagB	NaN	7.40035	NaN	NaN
P0A786	P0A786	Aspartate carbamoyltransferase catalytic chain	pyrB	NaN	7.40123	NaN	NaN
P0A794	P0A794	Pyridoxine 5-phosphate synthase	pdxJ	NaN	6.51326	5.76017	NaN
P0A796	P0A796	ATP-dependent 6-phosphofructokinase isozyme 1	pfkA	NaN	5.90119	NaN	NaN
P0A799	P0A799	Phosphoglycerate kinase	pgk	NaN	6.24573	NaN	NaN
P0A7A2	P0A7A2	Probable phosphoglycerate mutase GpmB	gpmB	NaN	NaN	5.96055	NaN
P0A7A9	P0A7A9	Inorganic pyrophosphatase	ppa	NaN	7.73158	NaN	NaN
P0A7B3	P0A7B3	NAD kinase	nadK	NaN	NaN	5.83173	NaN
P0A7B8	P0A7B8	ATP-dependent protease subunit HslV	hslV	NaN	8.60823	6.70749	NaN
P0A7D4	P0A7D4	Adenylosuccinate synthetase	purA	NaN	6.16782	6.39941	7.48369
P0A7E5	P0A7E5	CTP synthase	pyrG	NaN	NaN	8.26998	7.25612
P0A7E9	P0A7E9	Uridylate kinase	pyrH	NaN	7.51562	NaN	NaN
P0A7F3	P0A7F3	Aspartate carbamoyltransferase regulatory chain	pyrI	NaN	7.23576	NaN	NaN
P0A7F6	P0A7F6	S-adenosylmethionine decarboxylase proenzyme;S-adenosylmethionine decarboxylase beta chain;S-adenosylmethionine decarboxylase alpha chain	speD	NaN	6.54652	NaN	NaN
P0A7F9	P0A7F9	S-adenosylmethionine:tRNA ribosyltransferase-isomerase	queA	NaN	NaN	6.37357	6.33686
P0A7G6	P0A7G6	Protein RecA	recA	NaN	6.85662	7.90316	7.54748
P0A7I4	P0A7I4	Peptide chain release factor 3	prfC	NaN	NaN	5.6197	NaN
P0A7J0	P0A7J0	3,4-dihydroxy-2-butanone 4-phosphate synthase	ribB	NaN	NaN	6.5126	NaN
P0A7J3	P0A7J3	50S ribosomal protein L10	rplJ	NaN	6.13415	7.21748	7.90017
P0A7J7	P0A7J7	50S ribosomal protein L11	rplK	NaN	NaN	7.21848	7.89457
P0A7K2	P0A7K2	50S ribosomal protein L7/L12	rplL	NaN	8.25402	6.03266	7.81777
P0A7K6	P0A7K6	50S ribosomal protein L19	rplS	NaN	8.03007	7.10809	8.50269
P0A7L0	P0A7L0	50S ribosomal protein L1	rplA	NaN	8.28598	7.64805	7.70228
P0A7L3	P0A7L3	50S ribosomal protein L20	rplT	NaN	8.19866	7.64344	8.34384
P0A7L8	P0A7L8	50S ribosomal protein L27	rpmA	NaN	NaN	7.11494	7.54744
P0A7M2	P0A7M2	50S ribosomal protein L28	rpmB	NaN	NaN	7.17225	6.77938
P0A7M6	P0A7M6	50S ribosomal protein L29	rpmC	NaN	7.97781	6.53326	NaN
P0A7M9	P0A7M9	50S ribosomal protein L31	rpmE	NaN	8.16764	7.06262	8.72972
P0A7N4	P0A7N4	50S ribosomal protein L32	rpmF	NaN	7.49636	6.82727	NaN
P0A7P5	P0A7P5	50S ribosomal protein L34	rpmH	NaN	7.29557	7.25317	NaN
P0A7Q1	P0A7Q1	50S ribosomal protein L35	rpmI	NaN	NaN	6.6976	NaN
P0A7Q6	P0A7Q6	50S ribosomal protein L36	rpmJ	NaN	NaN	8.45445	NaN
P0A7R1	P0A7R1	50S ribosomal protein L9	rplI	NaN	7.25445	NaN	7.3962
P0A7R5	P0A7R5	30S ribosomal protein S10	rpsJ	NaN	NaN	7.95635	8.74691
P0A7R9	P0A7R9	30S ribosomal protein S11	rpsK	NaN	NaN	8.3598	6.47
P0A7S3	P0A7S3	30S ribosomal protein S12	rpsL	NaN	7.45589	8.7736	8.56222
P0A7S9	P0A7S9	30S ribosomal protein S13	rpsM	NaN	8.73624	7.20812	6.9547
P0A7T3	P0A7T3	30S ribosomal protein S16	rpsP	NaN	6.86249	NaN	7.26668
P0A7T7	P0A7T7	30S ribosomal protein S18	rpsR	NaN	7.40826	7.39108	8.13395
P0A7U3	P0A7U3	30S ribosomal protein S19	rpsS	NaN	8.85758	6.73943	NaN
P0A7U7	P0A7U7	30S ribosomal protein S20	rpsT	NaN	8.93624	7.20025	7.06647
P0A7V0	P0A7V0	30S ribosomal protein S2	rpsB	NaN	NaN	8.13994	8.51052
P0A7V3	P0A7V3	30S ribosomal protein S3	rpsC	NaN	NaN	8.55544	8.84157
P0A7V8	P0A7V8	30S ribosomal protein S4	rpsD	NaN	8.44163	7.86193	7.81142
P0A7W1	P0A7W1	30S ribosomal protein S5	rpsE	NaN	NaN	8.6375	8.38886
P0A7W7	P0A7W7	30S ribosomal protein S8	rpsH	NaN	7.41546	NaN	7.07401
P0A7X3	P0A7X3	30S ribosomal protein S9	rpsI	NaN	NaN	7.55055	7.80287
P0A7X6	P0A7X6	Ribosome maturation factor RimM	rimM	NaN	7.3921	5.77157	NaN
P0A7Z4	P0A7Z4	DNA-directed RNA polymerase subunit alpha	rpoA	NaN	8.24482	7.3175	7.09072
P0A817	P0A817	S-adenosylmethionine synthase	metK	NaN	7.56969	5.73557	5.5988
P0A825	P0A825	Serine hydroxymethyltransferase	glyA	NaN	7.2385	NaN	NaN
P0A832	P0A832	SsrA-binding protein	smpB	NaN	6.43286	NaN	6.81881
P0A836	P0A836	Succinyl-CoA ligase [ADP-forming] subunit beta	sucC	NaN	8.88904	NaN	NaN
P0A850	P0A850	Trigger factor	tig	NaN	7.10626	NaN	7.66044
P0A855	P0A855	Protein TolB	tolB	NaN	6.03262	NaN	6.89917
P0A858	P0A858	Triosephosphate isomerase	tpiA	NaN	6.41315	NaN	NaN
P0A862	P0A862	Thiol peroxidase	tpx	NaN	NaN	5.70817	7.7301
P0A870	P0A870	Transaldolase B	talB	NaN	6.93575	NaN	6.08654
P0A873	P0A873	tRNA (guanine-N(1)-)-methyltransferase	trmD	NaN	NaN	6.60267	NaN
P0A884	P0A884	Thymidylate synthase	thyA	NaN	NaN	6.22115	NaN
P0A887	P0A887	Ubiquinone/menaquinone biosynthesis C-methyltransferase UbiE	ubiE	NaN	NaN	7.4621	7.00035
P0A894	P0A894	RNase adapter protein RapZ	rapZ	NaN	NaN	6.5912	6.29745
P0A8A4	P0A8A4	Phosphoenolpyruvate synthase regulatory protein	ppsR	NaN	NaN	NaN	NaN
P0A8B2	P0A8B2	UPF0115 protein YfcN	yfcN	NaN	NaN	6.66427	NaN
P0A8B5	P0A8B5	Nucleoid-associated protein YbaB	ybaB	NaN	NaN	6.00043	NaN
P0A8D3	P0A8D3	UPF0178 protein YaiI	yaiI	NaN	NaN	5.92266	NaN
P0A8E1	P0A8E1	UPF0227 protein YcfP	ycfP	NaN	NaN	8.50239	5.75064
P0A8I8	P0A8I8	Ribosomal RNA large subunit methyltransferase H	rlmH	NaN	NaN	6.11123	NaN
P0A8J8	P0A8J8	ATP-dependent RNA helicase RhlB	rhlB	NaN	NaN	6.94784	7.25419
P0A8L1	P0A8L1	Serine--tRNA ligase	serS	NaN	7.55642	NaN	NaN
P0A8M3	P0A8M3	Threonine--tRNA ligase	thrS	NaN	7.80917	5.70779	NaN
P0A8M6	P0A8M6	UPF0265 protein YeeX	yeeX	NaN	NaN	6.55045	6.35292
P0A8N3	P0A8N3	Lysine--tRNA ligase	lysS	NaN	7.37206	NaN	5.41959
P0A8N5	P0A8N5	Lysine--tRNA ligase, heat inducible	lysU	NaN	7.73138	NaN	6.04587
P0A8Q3	P0A8Q3	Fumarate reductase subunit D	frdD	NaN	NaN	7.24499	NaN
P0A8T7	P0A8T7	DNA-directed RNA polymerase subunit beta	rpoC	NaN	5.15011	5.78035	7.4835
P0A8V2	P0A8V2	DNA-directed RNA polymerase subunit beta	rpoB	NaN	7.23206	NaN	7.01216
P0A8Y5	P0A8Y5	Sugar phosphatase YidA	yidA	NaN	NaN	6.66715	NaN
P0A8Z0	P0A8Z0	Acyl-CoA thioester hydrolase YciA	yciA	NaN	NaN	8.01995	6.53191
P0A903	P0A903	Outer membrane protein assembly factor BamC	bamC	NaN	5.84692	NaN	6.78868
P0A910	P0A910	Outer membrane protein A	ompA	NaN	6.94506	NaN	8.24497
P0A912	P0A912	Peptidoglycan-associated lipoprotein	pal	NaN	6.55683	7.38945	7.94562
P0A935	P0A935	Membrane-bound lytic murein transglycosylase A	mltA	NaN	NaN	6.39141	NaN
P0A951	P0A951	Spermidine N(1)-acetyltransferase	speG	NaN	NaN	6.59599	NaN
P0A991	P0A991	Fructose-bisphosphate aldolase class 1	fbaB	NaN	7.59897	NaN	NaN
P0A993	P0A993	Fructose-1,6-bisphosphatase class 1	fbp	NaN	NaN	8.10792	6.28323
P0A998	P0A998	Bacterial non-heme ferritin	ftnA	NaN	8.81816	NaN	5.87455
P0A9A9	P0A9A9	Ferric uptake regulation protein	fur	NaN	NaN	9.56271	7.95221
P0A9B2;P33898	P0A9B2	Glyceraldehyde-3-phosphate dehydrogenase A	gapA	NaN	8.80901	6.41385	5.93091
P0A9C0	P0A9C0	Anaerobic glycerol-3-phosphate dehydrogenase subunit A	glpA	NaN	NaN	5.91677	NaN
P0A9C5	P0A9C5	Glutamine synthetase	glnA	NaN	6.39245	NaN	NaN
P0A9D4	P0A9D4	Serine acetyltransferase	cysE	NaN	5.8037	NaN	NaN
P0A9D8	P0A9D8	2,3,4,5-tetrahydropyridine-2,6-dicarboxylate N-succinyltransferase	dapD	NaN	6.85856	NaN	5.98759
P0A9E0	P0A9E0	Arabinose operon regulatory protein	araC	NaN	7.03254	6.03096	NaN
P0A9F3	P0A9F3	HTH-type transcriptional regulator CysB	cysB	NaN	NaN	6.10565	6.85872
P0A9G6	P0A9G6	Isocitrate lyase	aceA	NaN	9.12401	NaN	NaN
P0A9H5	P0A9H5	Cob(I)yrinic acid a,c-diamide adenosyltransferase	btuR	NaN	NaN	6.13017	NaN
P0A9H7	P0A9H7	Cyclopropane-fatty-acyl-phospholipid synthase	cfa	NaN	NaN	5.57862	6.21288
P0A9J8	P0A9J8	P-protein;Chorismate mutase;Prephenate dehydratase	pheA	NaN	8.21906	6.16008	7.01212
P0A9K3	P0A9K3	PhoH-like protein	ybeZ	NaN	NaN	5.81631	6.1371
P0A9K9	P0A9K9	FKBP-type peptidyl-prolyl cis-trans isomerase SlyD	slyD	NaN	8.20612	9.92424	9.39157
P0A9L3	P0A9L3	FKBP-type 22 kDa peptidyl-prolyl cis-trans isomerase	fklB	NaN	7.43474	NaN	7.65441
P0A9M8	P0A9M8	Phosphate acetyltransferase	pta	NaN	7.60011	6.18136	7.18628
P0A9N4	P0A9N4	Pyruvate formate-lyase 1-activating enzyme	pflA	NaN	NaN	7.46665	5.68333
P0A9P0	P0A9P0	Dihydrolipoyl dehydrogenase	lpdA	NaN	8.23426	6.74337	7.71079
P0A9Q5	P0A9Q5	Acetyl-coenzyme A carboxylase carboxyl transferase subunit beta	accD	NaN	NaN	5.49174	7.40305
P0A9Q7	P0A9Q7	Aldehyde-alcohol dehydrogenase;Alcohol dehydrogenase;Acetaldehyde dehydrogenase [acetylating];Pyruvate-formate-lyase deactivase	adhE	NaN	5.37025	NaN	6.53545
P0A9R7	P0A9R7	Cell division ATP-binding protein FtsE	ftsE	NaN	NaN	7.03407	6.41536
P0A9S3	P0A9S3	Galactitol-1-phosphate 5-dehydrogenase	gatD	NaN	7.17811	6.92256	NaN
P0A9S5	P0A9S5	Glycerol dehydrogenase	gldA	NaN	NaN	6.88061	NaN
P0A9T8	P0A9T8	Uncharacterized ABC transporter ATP-binding protein YbbA	ybbA	NaN	NaN	5.71811	NaN
P0A9V1	P0A9V1	Lipopolysaccharide export system ATP-binding protein LptB	lptB	NaN	NaN	7.22935	5.42813
P0A9W3	P0A9W3	Energy-dependent translational throttle protein EttA	ettA	NaN	6.32758	7.50218	7.82865
P0A9W6	P0A9W6	Acid stress protein IbaG	ibaG	NaN	NaN	7.07624	NaN
P0A9W9	P0A9W9	Protein YrdA	yrdA	NaN	NaN	7.07284	NaN
P0A9X1	P0A9X1	Zinc import ATP-binding protein ZnuC	znuC	NaN	NaN	6.49589	NaN
P0A9X4	P0A9X4	Rod shape-determining protein MreB	mreB	NaN	NaN	7.44254	7.43425
P0AA10	P0AA10	50S ribosomal protein L13	rplM	NaN	7.84339	8.61769	8.12959
P0AA16	P0AA16	Transcriptional regulatory protein OmpR	ompR	NaN	6.94034	8.33556	7.92938
P0AA43	P0AA43	Ribosomal small subunit pseudouridine synthase A	rsuA	NaN	NaN	8.02812	8.055
P0AA57	P0AA57	Protein YobA	yobA	NaN	NaN	6.97598	6.12251
P0AA93	P0AA93	Sensor histidine kinase YpdA	ypdA	NaN	NaN	5.9735	NaN
P0AAA1	P0AAA1	Inner membrane protein YagU	yagU	NaN	5.88807	NaN	7.16143
P0AAC4	P0AAC4	Inner membrane protein YbhL	ybhL	NaN	NaN	6.13978	NaN
P0AAD6	P0AAD6	Serine transporter	sdaC	NaN	NaN	7.07332	7.29557
P0AAH0	P0AAH0	Phosphate import ATP-binding protein PstB	pstB	NaN	NaN	6.94851	5.38297
P0AAI3	P0AAI3	ATP-dependent zinc metalloprotease FtsH	ftsH	NaN	NaN	5.98265	6.93459
P0AAJ8	P0AAJ8	Hydrogenase-2 operon protein HybA	hybA	NaN	NaN	6.70182	NaN
P0AAN1	P0AAN1	Hydrogenase-2 operon protein HybE	hybE	NaN	NaN	NaN	NaN
P0AAX8	P0AAX8	Probable L,D-transpeptidase YbiS	ybiS	NaN	NaN	6.21091	6.47729
P0AB26	P0AB26	Uncharacterized lipoprotein YceB	yceB	NaN	NaN	6.63643	NaN
P0AB38	P0AB38	Penicillin-binding protein activator LpoB	lpoB	NaN	NaN	6.36977	6.61336
P0AB67	P0AB67	NAD(P) transhydrogenase subunit beta	pntB	NaN	NaN	6.74622	6.12975
P0AB71	P0AB71	Fructose-bisphosphate aldolase class 2	fbaA	NaN	7.96706	7.49212	6.97642
P0AB80	P0AB80	Branched-chain-amino-acid aminotransferase	ilvE	NaN	6.84265	NaN	NaN
P0AB89	P0AB89	Adenylosuccinate lyase	purB	NaN	7.16322	NaN	7.28067
P0ABA0	P0ABA0	ATP synthase subunit b	atpF	NaN	NaN	7.66997	7.75199
P0ABA4	P0ABA4	ATP synthase subunit delta	atpH	NaN	NaN	5.72914	6.4662
P0ABA6	P0ABA6	ATP synthase gamma chain	atpG	NaN	5.43276	NaN	NaN
P0ABB4	P0ABB4	ATP synthase subunit beta	atpD	NaN	5.7882	5.25181	7.73672
P0ABD5	P0ABD5	Acetyl-coenzyme A carboxylase carboxyl transferase subunit alpha	accA	NaN	NaN	5.5263	7.08664
P0ABF1	P0ABF1	Poly(A) polymerase I	pcnB	NaN	6.81239	NaN	6.35338
P0ABG7	P0ABG7	Rod shape-determining protein RodA	mrdB	NaN	NaN	6.32715	NaN
P0ABH0	P0ABH0	Cell division protein FtsA	ftsA	NaN	NaN	8.04964	6.93854
P0ABH7	P0ABH7	Citrate synthase	gltA	NaN	9.27763	NaN	6.56786
P0ABI8	P0ABI8	Cytochrome bo(3) ubiquinol oxidase subunit 1	cyoB	NaN	NaN	7.31952	7.12972
P0ABJ1	P0ABJ1	Cytochrome bo(3) ubiquinol oxidase subunit 2	cyoA	NaN	NaN	6.67001	7.35104
P0ABJ3	P0ABJ3	Cytochrome bo(3) ubiquinol oxidase subunit 3	cyoC	NaN	NaN	7.49687	NaN
P0ABJ9	P0ABJ9	Cytochrome bd-I ubiquinol oxidase subunit 1	cydA	NaN	NaN	6.00548	6.72654
P0ABK5	P0ABK5	Cysteine synthase A	cysK	NaN	6.54212	NaN	NaN
P0ABP6	P0ABP6	Protein DedA	dedA	NaN	NaN	7.01098	NaN
P0ABP8	P0ABP8	Purine nucleoside phosphorylase DeoD-type	deoD	NaN	8.39801	5.83472	NaN
P0ABU0	P0ABU0	1,4-dihydroxy-2-naphthoyl-CoA synthase	menB	NaN	6.72366	NaN	NaN
P0ABU2	P0ABU2	Ribosome-binding ATPase YchF	ychF	NaN	NaN	5.527	6.63987
P0ABV6	P0ABV6	Protein TolR	tolR	NaN	NaN	7.23065	NaN
P0AC33	P0AC33	Fumarate hydratase class I, aerobic	fumA	NaN	7.1934	5.99217	6.79523
P0AC38	P0AC38	Aspartate ammonia-lyase	aspA	NaN	8.50265	5.46446	NaN
P0AC41	P0AC41	Succinate dehydrogenase flavoprotein subunit	sdhA	NaN	6.89228	7.44793	7.47659
P0AC47	P0AC47	Fumarate reductase iron-sulfur subunit	frdB	NaN	NaN	6.51514	NaN
P0AC53	P0AC53	Glucose-6-phosphate 1-dehydrogenase;Extracellular death factor	zwf	NaN	7.83799	5.83478	NaN
P0AC69	P0AC69	Glutaredoxin-4	grxD	NaN	NaN	6.18463	7.06509
P0AC86	P0AC86	Glycogen phosphorylase	glgP	NaN	6.53008	NaN	NaN
P0ACB2	P0ACB2	Delta-aminolevulinic acid dehydratase	hemB	NaN	8.62121	NaN	NaN
P0ACB7	P0ACB7	Protein HemY	hemY	NaN	NaN	7.39983	6.56933
P0ACC3	P0ACC3	Iron-sulfur cluster insertion protein ErpA	erpA	NaN	NaN	7.97351	7.36357
P0ACC7	P0ACC7	Bifunctional protein GlmU;UDP-N-acetylglucosamine pyrophosphorylase;Glucosamine-1-phosphate N-acetyltransferase	glmU	NaN	5.59533	NaN	NaN
P0ACD4	P0ACD4	Iron-sulfur cluster assembly scaffold protein IscU	iscU	NaN	NaN	7.81654	7.20588
P0ACE7	P0ACE7	HIT-like protein HinT	hinT	NaN	NaN	7.62098	7.21667
P0ACF0	P0ACF0	DNA-binding protein HU-alpha	hupA	NaN	NaN	6.71396	NaN
P0ACF8	P0ACF8	DNA-binding protein H-NS	hns	NaN	NaN	NaN	7.02531
P0ACJ8	P0ACJ8	cAMP-activated global transcriptional regulator CRP	crp	NaN	NaN	8.42359	8.56017
P0ACK8	P0ACK8	L-fucose operon activator	fucR	NaN	NaN	5.87493	NaN
P0ACL0	P0ACL0	Glycerol-3-phosphate regulon repressor	glpR	NaN	NaN	7.66225	NaN
P0ACQ4	P0ACQ4	Hydrogen peroxide-inducible genes activator	oxyR	NaN	NaN	6.15467	6.30835
P0ACR9	P0ACR9	Transcriptional repressor MprA	mprA	NaN	NaN	7.76817	NaN
P0ACS7	P0ACS7	HTH-type transcriptional regulator RpiR	rpiR	NaN	NaN	6.4475	NaN
P0ACV4	P0ACV4	Lipopolysaccharide assembly protein A	lapA	NaN	NaN	8.19321	NaN
P0AD12	P0AD12	Protein YeeZ	yeeZ	NaN	NaN	5.92007	NaN
P0AD61	P0AD61	Pyruvate kinase I	pykF	NaN	6.77282	5.30341	5.22722
P0ADG4	P0ADG4	Inositol-1-monophosphatase	suhB	NaN	NaN	5.39499	6.62045
P0ADG7	P0ADG7	Inosine-5-monophosphate dehydrogenase	guaB	NaN	NaN	5.50826	5.66522
P0ADP2	P0ADP2	Uncharacterized protein YigI	yigI	NaN	NaN	6.66386	6.27434
P0ADP9	P0ADP9	Protein YihD	yihD	NaN	NaN	5.77994	NaN
P0ADQ2	P0ADQ2	Uncharacterized protein YiiD	yiiD	NaN	NaN	7.13735	6.50901
P0ADR8	P0ADR8	LOG family protein YgdH	ygdH	NaN	6.628	NaN	NaN
P0ADS2	P0ADS2	Cell division protein ZapA	zapA	NaN	NaN	6.81981	6.35713
P0ADT2	P0ADT2	UPF0441 protein YgiB	ygiB	NaN	NaN	6.19471	NaN
P0ADT8	P0ADT8	Uncharacterized protein YgiM	ygiM	NaN	NaN	6.57529	6.5695
P0ADV9	P0ADV9	Lipopolysaccharide export system protein LptC	lptC	NaN	NaN	6.98428	NaN
P0ADW3	P0ADW3	Inner membrane protein YhcB	yhcB	NaN	NaN	7.2089	7.11398
P0ADY3	P0ADY3	50S ribosomal protein L14	rplN	NaN	7.39336	8.41024	8.72456
P0ADY7	P0ADY7	50S ribosomal protein L16	rplP	NaN	NaN	8.36592	8.09951
P0ADZ0	P0ADZ0	50S ribosomal protein L23	rplW	NaN	6.45057	6.13868	6.49707
P0ADZ4	P0ADZ4	30S ribosomal protein S15	rpsO	NaN	8.6062	9.12704	8.46565
P0ADZ7	P0ADZ7	UPF0092 membrane protein YajC	yajC	NaN	NaN	8.09781	8.21712
P0AE01	P0AE01	tRNA (cytidine/uridine-2-O-)-methyltransferase TrmJ	trmJ	NaN	NaN	7.62907	NaN
P0AE06;P24180	P0AE06	Multidrug efflux pump subunit AcrA	acrA	NaN	7.06882	6.62932	7.56815
P0AE08	P0AE08	Alkyl hydroperoxide reductase subunit C	ahpC	NaN	6.67729	7.39992	8.61835
P0AE18	P0AE18	Methionine aminopeptidase	map	NaN	NaN	6.6567	NaN
P0AE48	P0AE48	Gamma-glutamylcyclotransferase family protein YtfP	ytfP	NaN	NaN	7.20423	NaN
P0AE52	P0AE52	Putative peroxiredoxin bcp	bcp	NaN	NaN	6.94078	7.31614
P0AE82	P0AE82	Sensor protein CpxA	cpxA	NaN	NaN	6.38225	NaN
P0AE88	P0AE88	Transcriptional regulatory protein CpxR	cpxR	NaN	NaN	9.19248	6.96384
P0AEE1	P0AEE1	Protein DcrB	dcrB	NaN	NaN	5.72582	7.40579
P0AEH1	P0AEH1	Regulator of sigma-E protease RseP	rseP	NaN	NaN	7.20096	NaN
P0AEI1	P0AEI1	tRNA-2-methylthio-N(6)-dimethylallyladenosine synthase	miaB	NaN	NaN	6.45326	7.23752
P0AEI4	P0AEI4	Ribosomal protein S12 methylthiotransferase RimO	rimO	NaN	NaN	6.11624	NaN
P0AEN4	P0AEN4	Cell division protein FtsL	ftsL	NaN	NaN	7.02057	NaN
P0AEP1	P0AEP1	Galactose-proton symporter	galP	NaN	NaN	7.16206	NaN
P0AES0	P0AES0	Bifunctional glutathionylspermidine synthetase/amidase;Glutathionylspermidine amidase;Glutathionylspermidine synthetase	gss	NaN	6.67951	NaN	NaN
P0AES6	P0AES6	DNA gyrase subunit B	gyrB	NaN	6.1914	7.78747	7.35459
P0AEX5	P0AEX5	Probable phosphoribulokinase	prkB	NaN	6.87877	NaN	NaN
P0AEZ3	P0AEZ3	Septum site-determining protein MinD	minD	NaN	NaN	8.00805	7.76424
P0AEZ9	P0AEZ9	Molybdenum cofactor biosynthesis protein B	moaB	NaN	NaN	6.4633	6.34727
P0AF08	P0AF08	Protein mrp	mrp	NaN	6.88877	6.6064	7.57459
P0AF36	P0AF36	Cell division protein ZapB	zapB	NaN	7.37105	NaN	6.92247
P0AF48	P0AF48	UPF0047 protein YjbQ	yjbQ	NaN	NaN	6.15223	NaN
P0AF93	P0AF93	2-iminobutanoate/2-iminopropanoate deaminase	ridA	NaN	NaN	6.32605	NaN
P0AFC3	P0AFC3	NADH-quinone oxidoreductase subunit A	nuoA	NaN	NaN	7.31769	7.01511
P0AFC7	P0AFC7	NADH-quinone oxidoreductase subunit B	nuoB	NaN	NaN	6.26766	7.11321
P0AFD1	P0AFD1	NADH-quinone oxidoreductase subunit E	nuoE	NaN	NaN	7.63381	7.6978
P0AFD6	P0AFD6	NADH-quinone oxidoreductase subunit I	nuoI	NaN	NaN	6.67735	6.5097
P0AFF6	P0AFF6	Transcription termination/antitermination protein NusA	nusA	NaN	7.06599	6.17123	6.75578
P0AFG0	P0AFG0	Transcription termination/antitermination protein NusG	nusG	NaN	NaN	6.87532	7.77256
P0AFG3	P0AFG3	2-oxoglutarate dehydrogenase E1 component	sucA	NaN	7.8511	5.10694	5.97208
P0AFG8	P0AFG8	Pyruvate dehydrogenase E1 component	aceE	NaN	7.73409	5.98061	6.7057
P0AFJ7	P0AFJ7	Low-affinity inorganic phosphate transporter 1	pitA	NaN	NaN	5.81995	5.94744
P0AFK4	P0AFK4	Spermidine/putrescine transport system permease protein PotB	potB	NaN	NaN	5.98462	NaN
P0AFL6	P0AFL6	Exopolyphosphatase	ppx	NaN	NaN	6.28122	NaN
P0AFM6	P0AFM6	Phage shock protein A	pspA	NaN	6.26755	NaN	NaN
P0AFM9	P0AFM9	Phage shock protein B	pspB	NaN	6.47857	NaN	6.58358
P0AFP4	P0AFP4	Uncharacterized oxidoreductase YbbO	ybbO	NaN	NaN	6.08479	NaN
P0AFP6	P0AFP6	Putative GTP cyclohydrolase 1 type 2	ybgI	NaN	8.17725	NaN	NaN
P0AFU4	P0AFU4	Transcriptional regulatory protein GlrR	glrR	NaN	NaN	5.65617	NaN
P0AFX0	P0AFX0	Ribosome hibernation promoting factor	hpf	NaN	NaN	7.18084	6.48902
P0AFX4	P0AFX4	Regulator of sigma D	rsd	NaN	6.37943	NaN	6.71531
P0AFZ3	P0AFZ3	Stringent starvation protein B	sspB	NaN	7.12988	7.11833	8.19709
P0AG27	P0AG27	Uncharacterized protein YibN	yibN	NaN	NaN	7.83671	7.54594
P0AG30	P0AG30	Transcription termination factor Rho	rho	NaN	NaN	7.86283	7.65146
P0AG44	P0AG44	50S ribosomal protein L17	rplQ	NaN	8.07489	7.48848	7.69505
P0AG48	P0AG48	50S ribosomal protein L21	rplU	NaN	7.89834	6.67034	7.16744
P0AG55	P0AG55	50S ribosomal protein L6	rplF	NaN	NaN	6.7973	7.87787
P0AG59	P0AG59	30S ribosomal protein S14	rpsN	NaN	NaN	8.76859	7.70349
P0AG63	P0AG63	30S ribosomal protein S17	rpsQ	NaN	9.08938	7.75021	8.37385
P0AG67	P0AG67	30S ribosomal protein S1	rpsA	NaN	8.99908	6.34213	8.34686
P0AG86	P0AG86	Protein-export protein SecB	secB	NaN	8.30842	NaN	7.50435
P0AG90	P0AG90	Protein translocase subunit SecD	secD	NaN	NaN	7.39998	6.87251
P0AG93	P0AG93	Protein translocase subunit SecF	secF	NaN	NaN	7.85563	7.00749
P0AG99	P0AG99	Protein-export membrane protein SecG	secG	NaN	NaN	6.59437	7.32818
P0AGA2	P0AGA2	Protein translocase subunit SecY	secY	NaN	NaN	6.79159	6.75611
P0AGE0	P0AGE0	Single-stranded DNA-binding protein	ssb	NaN	6.70069	7.27492	NaN
P0AGE9	P0AGE9	Succinyl-CoA ligase [ADP-forming] subunit alpha	sucD	NaN	9.04297	6.74345	6.05759
P0AGI8	P0AGI8	Trk system potassium uptake protein TrkA	trkA	NaN	NaN	6.38975	NaN
P0AGJ9	P0AGJ9	Tyrosine--tRNA ligase	tyrS	NaN	7.71659	NaN	NaN
P0AGK8	P0AGK8	HTH-type transcriptional regulator IscR	iscR	NaN	NaN	5.94094	NaN
P0C018	P0C018	50S ribosomal protein L18	rplR	NaN	7.47053	6.66642	7.23724
P0C054	P0C054	Small heat shock protein IbpA	ibpA	NaN	NaN	7.91759	NaN
P0C058	P0C058	Small heat shock protein IbpB	ibpB	NaN	NaN	7.24361	NaN
P0C0L7	P0C0L7	Proline/betaine transporter	proP	NaN	NaN	6.09545	6.88912
P0C0V0	P0C0V0	Periplasmic serine endoprotease DegP	degP	NaN	6.44764	5.70345	6.37894
P0C8J6	P0C8J6	D-tagatose-1,6-bisphosphate aldolase subunit GatY	gatY	NaN	NaN	NaN	7.17647
P0CB39	P0CB39	Phosphoethanolamine transferase EptC	eptC	NaN	NaN	7.15521	6.20292
P0CE48;P0CE47	P0CE48;P0CE47	Elongation factor Tu 2;Elongation factor Tu 1	tufB;tufA	NaN	8.06729	9.1229	8.7621
P10121	P10121	Signal recognition particle receptor FtsY	ftsY	NaN	7.04293	NaN	6.45194
P10346	P10346	Glutamine transport ATP-binding protein GlnQ	glnQ	NaN	NaN	7.72722	NaN
P10902	P10902	L-aspartate oxidase	nadB	NaN	NaN	6.11444	NaN
P11446	P11446	N-acetyl-gamma-glutamyl-phosphate reductase	argC	NaN	7.28126	NaN	NaN
P11447	P11447	Argininosuccinate lyase	argH	NaN	8.18036	NaN	NaN
P11557	P11557	Cell division protein DamX	damX	NaN	NaN	6.65082	7.24593
P11875	P11875	Arginine--tRNA ligase	argS	NaN	NaN	5.50951	NaN
P12295	P12295	Uracil-DNA glycosylase	ung	NaN	NaN	5.43611	NaN
P12758	P12758	Uridine phosphorylase	udp	NaN	8.4429	NaN	NaN
P13009	P13009	Methionine synthase	metH	NaN	7.19984	NaN	4.6701
P13029	P13029	Catalase-peroxidase	katG	NaN	7.71082	NaN	5.76396
P13035	P13035	Aerobic glycerol-3-phosphate dehydrogenase	glpD	NaN	NaN	5.1799	8.23378
P14175	P14175	Glycine betaine/L-proline transport ATP-binding protein ProV	proV	NaN	7.05511	6.94183	NaN
P15034	P15034	Xaa-Pro aminopeptidase	pepP	NaN	7.76437	NaN	NaN
P15038	P15038	Helicase IV	helD	NaN	NaN	5.73742	5.01957
P15288	P15288	Cytosol non-specific dipeptidase	pepD	NaN	7.54742	NaN	7.1702
P16456	P16456	Selenide, water dikinase	selD	NaN	NaN	6.34926	7.47545
P16659	P16659	Proline--tRNA ligase	proS	NaN	7.88815	NaN	NaN
P16691	P16691	Protein PhnO	phnO	NaN	NaN	5.90636	NaN
P17115	P17115	Arabinose 5-phosphate isomerase GutQ	gutQ	NaN	NaN	6.52884	NaN
P17169	P17169	Glutamine--fructose-6-phosphate aminotransferase [isomerizing]	glmS	NaN	7.67586	9.09019	8.19841
P17443	P17443	UDP-N-acetylglucosamine--N-acetylmuramyl-(pentapeptide) pyrophosphoryl-undecaprenol N-acetylglucosamine transferase	murG	NaN	NaN	6.90488	6.64391
P17444	P17444	Oxygen-dependent choline dehydrogenase	betA	NaN	NaN	5.51796	NaN
P17445	P17445	NAD/NADP-dependent betaine aldehyde dehydrogenase	betB	NaN	7.03814	NaN	NaN
P17846	P17846	Sulfite reductase [NADPH] hemoprotein beta-component	cysI	NaN	6.767	NaN	6.11714
P17952	P17952	UDP-N-acetylmuramate--L-alanine ligase	murC	NaN	NaN	8.03647	6.63478
P17993	P17993	Ubiquinone biosynthesis O-methyltransferase	ubiG	NaN	NaN	6.07831	6.33516
P18196	P18196	Septum site-determining protein MinC	minC	NaN	NaN	8.16962	NaN
P18335	P18335	Acetylornithine/succinyldiaminopimelate aminotransferase	argD	NaN	6.8802	NaN	NaN
P19934	P19934	Protein TolA	tolA	NaN	NaN	6.89864	6.3329
P20083	P20083	DNA topoisomerase 4 subunit B	parE	NaN	NaN	4.93063	6.57633
P20966	P20966	PTS system fructose-specific EIIBC component;Fructose-specific phosphotransferase enzyme IIB component;Fructose permease IIC component	fruA	NaN	NaN	7.10479	6.34881
P21151	P21151	3-ketoacyl-CoA thiolase	fadA	NaN	NaN	6.4633	NaN
P21165	P21165	Xaa-Pro dipeptidase	pepQ	NaN	5.65528	NaN	NaN
P21170	P21170	Biosynthetic arginine decarboxylase	speA	NaN	5.75929	6.40254	NaN
P21179	P21179	Catalase HPII	katE	NaN	7.41717	NaN	NaN
P21513	P21513	Ribonuclease E	rne	NaN	6.57796	6.87588	7.31416
P21599	P21599	Pyruvate kinase II	pykA	NaN	7.23977	7.52683	5.75837
P39901;P21866	P39901;P21866	Putative uncharacterized protein YbfI;KDP operon transcriptional regulatory protein KdpE	ybfI;kdpE	NaN	NaN	5.78428	NaN
P21889	P21889	Aspartate--tRNA ligase	aspS	NaN	8.36184	NaN	NaN
P22188	P22188	UDP-N-acetylmuramoyl-L-alanyl-D-glutamate--2,6-diaminopimelate ligase	murE	NaN	NaN	7.36862	5.7341
P22256	P22256	4-aminobutyrate aminotransferase GabT	gabT	NaN	7.73152	NaN	NaN
P23538	P23538	Phosphoenolpyruvate synthase	ppsA	NaN	7.20828	NaN	6.36519
P23721	P23721	Phosphoserine aminotransferase	serC	NaN	6.41096	NaN	NaN
P23836	P23836	Transcriptional regulatory protein PhoP	phoP	NaN	NaN	6.76167	6.28475
P23839	P23839	UPF0701 protein YicC	yicC	NaN	8.0122	NaN	NaN
P23845	P23845	Sulfate adenylyltransferase subunit 1	cysN	NaN	6.65936	NaN	6.39936
P23865	P23865	Tail-specific protease	prc	NaN	5.74054	NaN	NaN
P23883	P23883	Aldehyde dehydrogenase PuuC	puuC	NaN	6.9441	NaN	NaN
P23908	P23908	Acetylornithine deacetylase	argE	NaN	NaN	6.8361	NaN
P24175	P24175	Phosphomannomutase	manB	NaN	NaN	6.76921	NaN
P24182	P24182	Biotin carboxylase	accC	NaN	NaN	7.97973	7.38135
P24251	P24251	Sigma factor-binding protein Crl	crl	NaN	NaN	6.16125	7.26359
P25524	P25524	Cytosine deaminase	codA	NaN	6.91253	NaN	NaN
P25526	P25526	Succinate-semialdehyde dehydrogenase [NADP(+)] GabD	gabD	NaN	7.48643	NaN	NaN
P25534	P25534	2-octaprenyl-6-methoxyphenol hydroxylase	ubiH	NaN	NaN	6.0447	NaN
P25535	P25535	2-octaprenylphenol hydroxylase	ubiI	NaN	NaN	6.43138	NaN
P25539	P25539	Riboflavin biosynthesis protein RibD;Diaminohydroxyphosphoribosylaminopyrimidine deaminase;5-amino-6-(5-phosphoribosylamino)uracil reductase	ribD	NaN	NaN	6.8861	NaN
P25552	P25552	Guanosine-5-triphosphate,3-diphosphate pyrophosphatase	gppA	4.44892	NaN	7.36284	NaN
P25553	P25553	Lactaldehyde dehydrogenase	aldA	NaN	7.51951	NaN	5.09174
P25665	P25665	5-methyltetrahydropteroyltriglutamate--homocysteine methyltransferase	metE	NaN	5.51538	NaN	NaN
P25714	P25714	Membrane protein insertase YidC	yidC	NaN	NaN	6.39973	7.14273
P25746	P25746	High frequency lysogenization protein HflD	hflD	NaN	7.22984	6.34165	NaN
P26616	P26616	NAD-dependent malic enzyme	maeA	NaN	7.53749	NaN	7.02751
P27249	P27249	Bifunctional uridylyltransferase/uridylyl-removing enzyme;[Protein-PII] uridylyltransferase;[Protein-PII]-UMP uridylyl-removing enzyme	glnD	NaN	NaN	5.93777	5.22011
P27250	P27250	Aldehyde reductase Ahr	ahr	NaN	6.22053	NaN	NaN
P27298	P27298	Oligopeptidase A	prlC	NaN	5.06262	NaN	NaN
P27300	P27300	Tetraacyldisaccharide 4-kinase	lpxK	NaN	NaN	6.27091	NaN
P27302	P27302	Transketolase 1	tktA	NaN	8.51424	NaN	NaN
P27303	P27303	Multidrug export protein EmrA	emrA	NaN	NaN	6.70271	6.17938
P27306	P27306	Soluble pyridine nucleotide transhydrogenase	sthA	NaN	NaN	7.68665	6.65724
P27828	P27828	UDP-N-acetylglucosamine 2-epimerase	wecB	NaN	NaN	5.40844	NaN
P27829	P27829	UDP-N-acetyl-D-mannosamine dehydrogenase	wecC	NaN	NaN	6.56805	NaN
P27833	P27833	dTDP-4-amino-4,6-dideoxygalactose transaminase	rffA	NaN	NaN	5.35403	6.22453
P27837	P27837	Probable transport protein YifK	yifK	NaN	NaN	5.69125	NaN
P28248	P28248	Deoxycytidine triphosphate deaminase	dcd	NaN	7.16435	NaN	NaN
P28306	P28306	UPF0755 protein YceG	yceG	NaN	NaN	6.48349	NaN
P28903	P28903	Anaerobic ribonucleoside-triphosphate reductase	nrdD	NaN	NaN	5.08375	NaN
P29131	P29131	Cell division protein FtsN	ftsN	NaN	NaN	6.53689	5.97738
P30177	P30177	Uncharacterized protein YbiB	ybiB	NaN	NaN	5.47197	NaN
P30744;P42630;P16095	P30744	L-serine dehydratase 2	sdaB	NaN	NaN	6.54481	6.90141
P30750	P30750	Methionine import ATP-binding protein MetN	metN	NaN	NaN	6.45731	5.47553
P30843	P30843	Transcriptional regulatory protein BasR	basR	NaN	NaN	7.37158	6.10843
P30958	P30958	Transcription-repair-coupling factor	mfd	NaN	NaN	6.94216	6.48731
P31057	P31057	3-methyl-2-oxobutanoate hydroxymethyltransferase	panB	NaN	7.77463	NaN	NaN
P31120	P31120	Phosphoglucosamine mutase	glmM	NaN	6.81397	NaN	NaN
P31224;P24181	P31224	Multidrug efflux pump subunit AcrB	acrB	NaN	NaN	7.99375	6.45169
P31663	P31663	Pantothenate synthetase	panC	NaN	6.01978	NaN	NaN
P31802	P31802	Nitrate/nitrite response regulator protein NarP	narP	NaN	NaN	6.66044	6.98392
P32099	P32099	Lipoate-protein ligase A	lplA	NaN	NaN	5.49859	NaN
P32125	P32125	Molybdopterin-guanine dinucleotide biosynthesis adapter protein	mobB	NaN	NaN	7.5039	NaN
P32132	P32132	GTP-binding protein TypA/BipA	typA	NaN	6.36864	5.38602	7.61096
P32664	P32664	NADH pyrophosphatase	nudC	NaN	NaN	6.84741	5.85419
P33030	P33030	Uncharacterized protein YeiR	yeiR	NaN	NaN	7.28423	6.24952
P33195	P33195	Glycine dehydrogenase (decarboxylating)	gcvP	NaN	8.55712	NaN	4.87914
P33232	P33232	L-lactate dehydrogenase	lldD	NaN	NaN	5.97877	6.28194
P33363	P33363	Periplasmic beta-glucosidase	bglX	NaN	6.72364	NaN	NaN
P33570	P33570	Transketolase 2	tktB	NaN	6.86251	NaN	NaN
P33602	P33602	NADH-quinone oxidoreductase subunit G	nuoG	NaN	NaN	6.75252	6.97562
P34209	P34209	Protein YdcF	ydcF	NaN	NaN	5.60722	6.9737
P35340	P35340	Alkyl hydroperoxide reductase subunit F	ahpF	NaN	7.57392	NaN	6.12969
P36672	P36672	PTS system trehalose-specific EIIBC component;Trehalose-specific phosphotransferase enzyme IIB component;Trehalose permease IIC component	treB	NaN	NaN	7.19092	6.64179
P36683	P36683	Aconitate hydratase B	acnB	NaN	7.7385	7.14298	7.198
P36771	P36771	Probable HTH-type transcriptional regulator LrhA	lrhA	NaN	6.59066	NaN	NaN
P36938	P36938	Phosphoglucomutase	pgm	NaN	7.29975	NaN	NaN
P36999	P36999	23S rRNA (guanine(745)-N(1))-methyltransferase	rlmA	NaN	NaN	7.10585	NaN
P37051	P37051	Formyltetrahydrofolate deformylase	purU	NaN	NaN	4.90715	NaN
P37095	P37095	Peptidase B	pepB	NaN	7.82234	NaN	NaN
P37127	P37127	Protein AegA	aegA	NaN	NaN	5.37958	NaN
P37147	P37147	UPF0716 protein FxsA	fxsA	NaN	NaN	7.23116	NaN
P37180	P37180	Probable Ni/Fe-hydrogenase 2 b-type cytochrome subunit	hybB	NaN	NaN	NaN	NaN
P37339	P37339	L-2-hydroxyglutarate oxidase LhgO	lhgO	NaN	7.06483	7.79058	NaN
P37617	P37617	Lead, cadmium, zinc and mercury-transporting ATPase	zntA	NaN	NaN	6.50072	6.27096
P37671	P37671	HTH-type transcriptional regulator YiaJ	yiaJ	NaN	NaN	6.26083	NaN
P37691	P37691	Uncharacterized protein YibQ	yibQ	NaN	NaN	6.52912	5.44091
P37759	P37759	dTDP-glucose 4,6-dehydratase 1	rfbB	NaN	5.89237	NaN	NaN
P37903	P37903	Universal stress protein F	uspF	NaN	NaN	NaN	6.38286
P38035	P38035	Transcriptional regulatory protein RtcR	rtcR	NaN	6.28571	NaN	NaN
P38038	P38038	Sulfite reductase [NADPH] flavoprotein alpha-component	cysJ	NaN	6.43575	NaN	6.00822
P39099	P39099	Periplasmic pH-dependent serine endoprotease DegQ	degQ	NaN	7.31133	NaN	NaN
P39177	P39177	Universal stress protein G	uspG	NaN	NaN	6.34007	5.9545
P39199	P39199	50S ribosomal protein L3 glutamine methyltransferase	prmB	NaN	7.83541	NaN	NaN
P39300	P39300	Probable L-ascorbate-6-phosphate lactonase UlaG	ulaG	NaN	NaN	6.34836	NaN
P39382	P39382	Uncharacterized protein YjiK	yjiK	NaN	NaN	6.42254	NaN
P39406	P39406	Ribosomal RNA small subunit methyltransferase C	rsmC	NaN	6.96117	NaN	NaN
P39451	P39451	Alcohol dehydrogenase, propanol-preferring	adhP	NaN	NaN	NaN	NaN
P39831	P39831	NADP-dependent 3-hydroxy acid dehydrogenase YdfG	ydfG	NaN	NaN	6.84175	7.03663
P39835	P39835	High-affinity gluconate transporter	gntT	NaN	NaN	5.95865	NaN
P40120	P40120	Glucans biosynthesis protein D	mdoD	NaN	5.42607	NaN	NaN
P40710	P40710	Lipoprotein NlpE	nlpE	NaN	NaN	5.73309	NaN
P41409	P41409	Pyrimidine-specific ribonucleoside hydrolase RihA	rihA	NaN	7.21998	NaN	NaN
P42588	P42588	Putrescine aminotransferase	patA	NaN	6.26975	NaN	NaN
P42624	P42624	Pirin-like protein YhaK	yhaK	NaN	NaN	6.59011	NaN
P43672	P43672	ABC transporter ATP-binding protein uup	uup	NaN	NaN	5.81561	6.03691
P45395	P45395	Arabinose 5-phosphate isomerase KdsD	kdsD	NaN	NaN	7.32854	NaN
P45464	P45464	Penicillin-binding protein activator LpoA	lpoA	NaN	5.93901	NaN	6.45266
P45523	P45523	FKBP-type peptidyl-prolyl cis-trans isomerase FkpA	fkpA	NaN	8.08361	NaN	NaN
P45578	P45578	S-ribosylhomocysteine lyase	luxS	NaN	NaN	8.03961	NaN
P45756	P45756	Putative general secretion pathway protein A	gspA	NaN	NaN	6.23734	NaN
P45955	P45955	Uncharacterized protein YbgF	ybgF	NaN	7.69354	NaN	NaN
P46837	P46837	Protein YhgF	yhgF	NaN	6.06047	NaN	6.91316
P46859	P46859	Thermoresistant gluconokinase	gntK	NaN	NaN	8.14436	NaN
P50457	P50457	4-aminobutyrate aminotransferase PuuE	puuE	NaN	6.50928	NaN	NaN
P52061	P52061	dITP/XTP pyrophosphatase	rdgB	NaN	NaN	5.92656	NaN
P52067	P52067	Fosmidomycin resistance protein	fsr	NaN	NaN	5.99646	NaN
P52076	P52076	Transcriptional regulatory protein QseB	qseB	NaN	NaN	6.00805	NaN
P52108	P52108	Transcriptional regulatory protein RstA	rstA	NaN	NaN	7.03782	6.92712
P52643	P52643	D-lactate dehydrogenase	ldhA	NaN	7.31762	NaN	NaN
P52647	P52647	Probable pyruvate-flavodoxin oxidoreductase	ydbK	NaN	5.9065	5.01803	5.52069
P60240	P60240	RNA polymerase-associated protein RapA	rapA	NaN	6.63142	NaN	5.67802
P60293	P60293	Chromosome partition protein MukF	mukF	NaN	7.35147	7.04704	5.60012
P60422	P60422	50S ribosomal protein L2	rplB	NaN	5.90579	8.30367	8.35065
P60438	P60438	50S ribosomal protein L3	rplC	NaN	8.19181	7.30948	7.17275
P60624	P60624	50S ribosomal protein L24	rplX	NaN	8.09349	6.79515	6.29195
P60651	P60651	Agmatinase	speB	NaN	6.60069	NaN	NaN
P60716	P60716	Lipoyl synthase	lipA	NaN	NaN	7.68978	7.01561
P60720	P60720	Octanoyltransferase	lipB	NaN	NaN	6.30891	6.41387
P60723	P60723	50S ribosomal protein L4	rplD	NaN	7.57055	7.55584	7.73858
P60752	P60752	Lipid A export ATP-binding/permease protein MsbA	msbA	NaN	NaN	5.0658	5.79004
P60785	P60785	Elongation factor 4	lepA	NaN	NaN	6.70551	7.62908
P61175	P61175	50S ribosomal protein L22	rplV	NaN	7.88559	7.59059	8.2242
P61714	P61714	6,7-dimethyl-8-ribityllumazine synthase	ribE	NaN	NaN	7.68379	7.04972
P61889	P61889	Malate dehydrogenase	mdh	NaN	6.32901	NaN	6.67476
P62399	P62399	50S ribosomal protein L5	rplE	NaN	7.44661	6.16507	8.76279
P62615	P62615	4-diphosphocytidyl-2-C-methyl-D-erythritol kinase	ispE	NaN	NaN	5.91489	NaN
P62620	P62620	4-hydroxy-3-methylbut-2-en-1-yl diphosphate synthase (flavodoxin)	ispG	NaN	6.77983	6.67339	6.60705
P62707	P62707	2,3-bisphosphoglycerate-dependent phosphoglycerate mutase	gpmA	NaN	7.15458	NaN	5.79946
P63020	P63020	Fe/S biogenesis protein NfuA	nfuA	NaN	7.46764	6.98319	8.15694
P63284	P63284	Chaperone protein ClpB	clpB	NaN	7.23581	7.1113	7.9377
P63417	P63417	Uncharacterized N-acetyltransferase YhbS	yhbS	NaN	NaN	6.20507	NaN
P64483	P64483	Uncharacterized protein YeaK	yeaK	NaN	NaN	5.97506	NaN
P64574	P64574	Uncharacterized protein YghW	yghW	NaN	NaN	5.86397	6.13159
P64588	P64588	Transcriptional regulator YqjI	yqjI	NaN	6.36719	8.58641	7.80232
P64596	P64596	Uncharacterized protein YraP	yraP	NaN	NaN	7.21856	6.16903
P64612	P64612	Cell division protein ZapE	zapE	NaN	NaN	6.35566	5.74036
P64624	P64624	Uncharacterized protein YheO	yheO	NaN	NaN	5.99991	6.00087
P65870	P65870	6-carboxy-5,6,7,8-tetrahydropterin synthase	queD	NaN	NaN	7.616	NaN
P67087	P67087	Ribosomal RNA small subunit methyltransferase I	rsmI	NaN	NaN	6.4697	NaN
P67762	P67762	UPF0306 protein YhbP	yhbP	NaN	NaN	5.84712	NaN
P67910	P67910	ADP-L-glycero-D-manno-heptose-6-epimerase	hldD	NaN	8.16313	NaN	NaN
P68679	P68679	30S ribosomal protein S21	rpsU	NaN	NaN	8.15327	NaN
P69222	P69222	Translation initiation factor IF-1	infA	NaN	NaN	6.8723	6.8785
P69428	P69428	Sec-independent protein translocase protein TatA	tatA	NaN	NaN	7.28621	7.03663
P69490	P69490	Cytochrome c-type biogenesis protein CcmE	ccmE	NaN	NaN	6.00548	NaN
P69741	P69741	Hydrogenase-2 small chain	hybO	NaN	NaN	7.6401	NaN
P69776	P69776	Major outer membrane lipoprotein Lpp	lpp	NaN	6.65284	NaN	8.15918
P69805	P69805	Mannose permease IID component	manZ	NaN	NaN	5.65794	NaN
P69828	P69828	Galactitol-specific phosphotransferase enzyme IIA component	gatA	NaN	NaN	7.06062	NaN
P75821	P75821	Uncharacterized protein YbjS	ybjS	NaN	NaN	7.34219	6.51976
P75838	P75838	Ribosomal protein S12 methylthiotransferase accessory factor YcaO	ycaO	NaN	7.63526	NaN	NaN
P75914	P75914	Probable phosphatase YcdX	ycdX	NaN	NaN	5.92743	NaN
P75949	P75949	Beta-hexosaminidase	nagZ	NaN	NaN	6.49554	NaN
P75957	P75957	Lipoprotein-releasing system ATP-binding protein LolD	lolD	NaN	NaN	6.82655	NaN
P75958	P75958	Lipoprotein-releasing system transmembrane protein LolE	lolE	NaN	NaN	NaN	NaN
P75990	P75990	Blue light- and temperature-regulated antirepressor BluF	bluF	NaN	6.64431	NaN	NaN
P76034	P76034	Uncharacterized HTH-type transcriptional regulator YciT	yciT	NaN	NaN	6.35955	NaN
P76270	P76270	Free methionine-R-sulfoxide reductase	msrC	NaN	NaN	6.3064	7.26963
P76344	P76344	Metal-binding protein ZinT	zinT	NaN	NaN	7.3748	NaN
P76373	P76373	UDP-glucose 6-dehydrogenase	ugd	NaN	NaN	6.67366	NaN
P76472	P76472	Probable 4-deoxy-4-formamido-L-arabinose-phosphoundecaprenol deformylase ArnD	arnD	NaN	NaN	7.31141	NaN
P76558	P76558	NADP-dependent malic enzyme	maeB	NaN	6.38678	NaN	NaN
P76575	P76575	Uncharacterized protein YfgJ	yfgJ	NaN	NaN	7.22013	NaN
P76585	P76585	Uncharacterized protein YphG	yphG	NaN	6.04821	NaN	NaN
P76621	P76621	Protein CsiD	csiD	NaN	5.71511	NaN	NaN
P77173	P77173	Cell division protein ZipA	zipA	NaN	NaN	7.9232	7.61413
P77265	P77265	Multidrug resistance-like ATP-binding protein MdlA	mdlA	NaN	NaN	5.93435	NaN
P77376	P77376	Uncharacterized oxidoreductase YdgJ	ydgJ	NaN	6.66701	NaN	NaN
P77395	P77395	Uncharacterized protein YbbN	ybbN	NaN	6.18087	NaN	7.14295
P77398	P77398	Bifunctional polymyxin resistance protein ArnA;UDP-4-amino-4-deoxy-L-arabinose formyltransferase;UDP-glucuronic acid oxidase, UDP-4-keto-hexauronic acid decarboxylating	arnA	NaN	7.42014	8.38426	6.95298
P77433	P77433	Uncharacterized protein YkgG	ykgG	NaN	NaN	5.63079	5.41362
P77434	P77434	Glutamate-pyruvate aminotransferase AlaC	alaC	NaN	NaN	6.65195	NaN
P77485	P77485	Sensor kinase CusS	cusS	NaN	NaN	6.41736	NaN
P77488	P77488	1-deoxy-D-xylulose-5-phosphate synthase	dxs	NaN	6.03246	NaN	NaN
P77610	P77610	L-asparagine permease	ansP	NaN	NaN	6.16125	NaN
P77674	P77674	Gamma-aminobutyraldehyde dehydrogenase	prr	NaN	5.83577	NaN	NaN
P77690	P77690	UDP-4-amino-4-deoxy-L-arabinose--oxoglutarate aminotransferase	arnB	NaN	NaN	6.59899	NaN
P77718	P77718	tRNA sulfurtransferase	thiI	NaN	NaN	5.71378	6.64479
P77737	P77737	Oligopeptide transport ATP-binding protein OppF	oppF	NaN	NaN	6.13255	7.06651
P77757	P77757	Undecaprenyl-phosphate 4-deoxy-4-formamido-L-arabinose transferase	arnC	NaN	NaN	7.85983	NaN
P77781	P77781	1,4-dihydroxy-2-naphthoyl-CoA hydrolase	menI	NaN	NaN	6.57533	NaN
P77808	P77808	NMN amidohydrolase-like protein YfaY	yfaY	NaN	7.12727	NaN	NaN
Q46829	Q46829	6-phospho-beta-glucosidase BglA	bglA	NaN	5.68171	NaN	NaN
Q59385	Q59385	Copper-exporting P-type ATPase A	copA	NaN	NaN	6.2379	NaN
P00452	P00452	Ribonucleoside-diphosphate reductase 1 subunit alpha	nrdA	NaN	NaN	NaN	6.74146
P00579	P00579	RNA polymerase sigma factor RpoD	rpoD	NaN	NaN	NaN	7.02522
P00803	P00803	Signal peptidase I	lepB	NaN	NaN	NaN	6.58003
P00936	P00936	Adenylate cyclase	cyaA	NaN	NaN	NaN	6.92955
P00960	P00960	Glycine--tRNA ligase alpha subunit	glyQ	NaN	NaN	NaN	7.36728
P00963	P00963	Aspartate--ammonia ligase	asnA	NaN	NaN	NaN	6.12545
P02918	P02918	Penicillin-binding protein 1A;Penicillin-insensitive transglycosylase;Penicillin-sensitive transpeptidase	mrcA	NaN	NaN	NaN	5.64403
P03004	P03004	Chromosomal replication initiator protein DnaA	dnaA	NaN	NaN	NaN	5.62023
P04693	P04693	Aromatic-amino-acid aminotransferase	tyrB	NaN	NaN	NaN	5.58837
P04846	P04846	Lipoprotein 28	nlpA	NaN	NaN	NaN	7.14308
P04994	P04994	Exodeoxyribonuclease 7 large subunit	xseA	NaN	NaN	NaN	5.40919
P06610	P06610	Vitamin B12 transport periplasmic protein BtuE	btuE	NaN	NaN	NaN	6.63032
P06992	P06992	Ribosomal RNA small subunit methyltransferase A	rsmA	NaN	NaN	NaN	6.86876
P06993	P06993	HTH-type transcriptional regulator MalT	malT	NaN	NaN	NaN	5.26271
P06996	P06996	Outer membrane protein C	ompC	NaN	NaN	NaN	5.86906
P07003	P07003	Pyruvate dehydrogenase [ubiquinone];Alpha-peptide	poxB	NaN	NaN	NaN	5.35295
P07023	P07023	T-protein;Chorismate mutase;Prephenate dehydrogenase	tyrA	NaN	NaN	NaN	5.73235
P07604	P07604	Transcriptional regulatory protein TyrR	tyrR	NaN	NaN	NaN	6.01338
P08178	P08178	Phosphoribosylformylglycinamidine cyclo-ligase	purM	NaN	NaN	NaN	7.88157
P08194	P08194	Glycerol-3-phosphate transporter	glpT	NaN	NaN	NaN	6.53561
P08506	P08506	D-alanyl-D-alanine carboxypeptidase DacC	dacC	NaN	NaN	NaN	7.44906
P09127	P09127	Putative uroporphyrinogen-III C-methyltransferase	hemX	NaN	NaN	NaN	6.41244
P09323	P09323	PTS system N-acetylglucosamine-specific EIICBA component;N-acetylglucosamine permease IIC component;N-acetylglucosamine-specific phosphotransferase enzyme IIB component;N-acetylglucosamine-specific phosphotransferase enzyme IIA component	nagE	NaN	NaN	NaN	5.9128
P09831	P09831	Glutamate synthase [NADPH] large chain	gltB	NaN	NaN	NaN	4.42025
P09980	P09980	ATP-dependent DNA helicase Rep	rep	NaN	NaN	NaN	4.97163
P0A6E6	P0A6E6	ATP synthase epsilon chain	atpC	NaN	NaN	NaN	7.10561
P0A6F3	P0A6F3	Glycerol kinase	glpK	NaN	NaN	NaN	6.74248
P0A6I0	P0A6I0	Cytidylate kinase	cmk	NaN	NaN	NaN	5.97755
P0A6J8	P0A6J8	D-alanine--D-alanine ligase A	ddlA	NaN	NaN	NaN	5.12972
P0A6K3	P0A6K3	Peptide deformylase	def	NaN	NaN	NaN	6.06633
P0A6P5	P0A6P5	GTPase Der	der	NaN	NaN	NaN	7.05812
P0A6U8	P0A6U8	Glycogen synthase	glgA	NaN	NaN	NaN	6.63984
P0A707	P0A707	Translation initiation factor IF-3;Translation initiation factor IF-3, N-terminally processed;Translation initiation factor IF-3S	infC	NaN	NaN	NaN	6.95835
P0A742	P0A742	Large-conductance mechanosensitive channel	mscL	NaN	NaN	NaN	6.87486
P0A780	P0A780	N utilization substance protein B	nusB	NaN	NaN	NaN	6.85313
P0A7A7	P0A7A7	Glycerol-3-phosphate acyltransferase	plsB	NaN	NaN	NaN	5.50323
P0A7B5	P0A7B5	Glutamate 5-kinase	proB	NaN	NaN	NaN	6.15942
P0A7D7	P0A7D7	Phosphoribosylaminoimidazole-succinocarboxamide synthase	purC	NaN	NaN	NaN	7.74349
P0A7E1	P0A7E1	Dihydroorotate dehydrogenase (quinone)	pyrD	NaN	NaN	NaN	6.03258
P0A7G2	P0A7G2	Ribosome-binding factor A	rbfA	NaN	NaN	NaN	7.00337
P0A7Y0	P0A7Y0	Ribonuclease 3	rnc	NaN	NaN	NaN	6.72977
P0A853	P0A853	Tryptophanase	tnaA	NaN	NaN	NaN	7.23787
P0A877	P0A877	Tryptophan synthase alpha chain	trpA	NaN	NaN	NaN	5.76568
P0A8A2	P0A8A2	Probable transcriptional regulatory protein YeeN	yeeN	NaN	NaN	NaN	6.43239
P0A8F0	P0A8F0	Uracil phosphoribosyltransferase	upp	NaN	NaN	NaN	7.40425
P0A8F4	P0A8F4	Uridine kinase	udk	NaN	NaN	NaN	5.99079
P0A8G6	P0A8G6	NAD(P)H dehydrogenase (quinone)	wrbA	NaN	NaN	NaN	6.69949
P0A8I5	P0A8I5	tRNA (guanine-N(7)-)-methyltransferase	trmB	NaN	NaN	NaN	6.89864
P0A8M0	P0A8M0	Asparagine--tRNA ligase	asnS	NaN	NaN	NaN	5.48591
P0A8P8	P0A8P8	Tyrosine recombinase XerD	xerD	NaN	NaN	NaN	5.96372
P0A8T1	P0A8T1	Ribosomal protein L11 methyltransferase	prmA	NaN	NaN	NaN	6.0892
P0A8V6	P0A8V6	Fatty acid metabolism regulator protein	fadR	NaN	NaN	NaN	5.86738
P0A8Y3	P0A8Y3	Alpha-D-glucose-1-phosphate phosphatase YihX	yihX	NaN	NaN	NaN	5.66634
P0A905	P0A905	Outer membrane lipoprotein SlyB	slyB	NaN	NaN	NaN	6.92348
P0A927	P0A927	Nucleoside-specific channel-forming protein tsx	tsx	NaN	NaN	NaN	5.85643
P0A937	P0A937	Outer membrane protein assembly factor BamE	bamE	NaN	NaN	NaN	7.03511
P0A940	P0A940	Outer membrane protein assembly factor BamA	bamA	NaN	NaN	NaN	6.08465
P0A9A6	P0A9A6	Cell division protein FtsZ	ftsZ	NaN	NaN	NaN	7.7509
P0A9B6	P0A9B6	D-erythrose-4-phosphate dehydrogenase	epd	NaN	NaN	NaN	6.21529
P0A9E5	P0A9E5	Fumarate and nitrate reduction regulatory protein	fnr	NaN	NaN	NaN	6.46721
P0A9H1	P0A9H1	G/U mismatch-specific DNA glycosylase	mug	NaN	NaN	NaN	5.92146
P0A9J4	P0A9J4	2-dehydropantoate 2-reductase	panE	NaN	NaN	NaN	6.13146
P0A9K1	P0A9K1	Protein PhoH	phoH	NaN	NaN	NaN	5.63511
P0A9K7	P0A9K7	Phosphate-specific transport system accessory protein PhoU	phoU	NaN	NaN	NaN	6.08768
P0A9M0	P0A9M0	Lon protease	lon	NaN	NaN	NaN	7.10721			ATP-dependent serine protease
P0A9P6	P0A9P6	ATP-dependent RNA helicase DeaD	deaD	NaN	NaN	NaN	6.66719
P0A9Q1	P0A9Q1	Aerobic respiration control protein ArcA	arcA	NaN	NaN	NaN	7.58245
P0A9T0	P0A9T0	D-3-phosphoglycerate dehydrogenase	serA	NaN	NaN	NaN	6.01878
P0A9U3	P0A9U3	Uncharacterized ABC transporter ATP-binding protein YbiT	ybiT	NaN	NaN	NaN	5.01161
P0AA25	P0AA25	Thioredoxin-1	trxA	NaN	NaN	NaN	7.374
P0AA39	P0AA39	Ribosomal large subunit pseudouridine synthase C	rluC	NaN	NaN	NaN	5.43249
P0AAB6	P0AAB6	UTP--glucose-1-phosphate uridylyltransferase	galF	NaN	NaN	NaN	6.78817
P0AAC0	P0AAC0	Universal stress protein E	uspE	NaN	NaN	NaN	6.73492
P0AAC8	P0AAC8	Iron-binding protein IscA	iscA	NaN	NaN	NaN	6.91143
P0AAJ5;P0AAJ3	P0AAJ5	Formate dehydrogenase-O iron-sulfur subunit	fdoH	NaN	NaN	NaN	6.40329
P0AAR0	P0AAR0	Hha toxicity modulator TomB	tomB	NaN	NaN	NaN	8.17327
P0AB28	P0AB28	Uncharacterized protein YceD	yceD	NaN	NaN	NaN	NaN
P0AB58	P0AB58	Lipopolysaccharide assembly protein B	lapB	NaN	NaN	NaN	5.15996
P0AB91	P0AB91	Phospho-2-dehydro-3-deoxyheptonate aldolase, Phe-sensitive	aroG	NaN	NaN	NaN	5.35005
P0ABB0	P0ABB0	ATP synthase subunit alpha	atpA	NaN	NaN	NaN	7.37411
P0ABB8	P0ABB8	Magnesium-transporting ATPase, P-type 1	mgtA	NaN	NaN	NaN	6.29686
P0ABC3	P0ABC3	Modulator of FtsH protease HflC	hflC	NaN	NaN	NaN	6.61785			ATP-dependent zinc metalloprotease FtsH
P0ABC7	P0ABC7	Modulator of FtsH protease HflK	hflK	NaN	NaN	NaN	6.83058
P0ABE2	P0ABE2	Protein BolA	bolA	NaN	NaN	NaN	6.54646
P0ABH9	P0ABH9	ATP-dependent Clp protease ATP-binding subunit ClpA	clpA	NaN	NaN	NaN	5.97932			It directs the protease to specific substrates. It has unfoldase activity . The primary function of the ClpA-ClpP complex appears to be the degradation of unfolded or abnormal proteins. ClpP: In the absence of ATP, only oligopeptides shorter than five residues are hydrolyzed (such as succinyl-Leu-Tyr-|-NHMec; and Leu-Tyr-Leu-|-Tyr-Trp, in which cleavage of the -Tyr-|-Leu- and -Tyr-|-Trp bonds als…
P0ABN5	P0ABN5	Anaerobic C4-dicarboxylate transporter DcuA	dcuA	NaN	NaN	NaN	6.42617
P0ABZ6	P0ABZ6	Chaperone SurA	surA	NaN	NaN	NaN	5.7219
P0AC02	P0AC02	Outer membrane protein assembly factor BamD	bamD	NaN	NaN	NaN	6.25062
P0AC30	P0AC30	Cell division protein FtsX	ftsX	NaN	NaN	NaN	5.62067
P0AC44	P0AC44	Succinate dehydrogenase hydrophobic membrane anchor subunit	sdhD	NaN	NaN	NaN	5.98509
P0ACA7	P0ACA7	Glutathione S-transferase GstB	gstB	NaN	NaN	NaN	NaN
P0ACB0	P0ACB0	Replicative DNA helicase	dnaB	NaN	NaN	NaN	5.80736
P0ACB4	P0ACB4	Protoporphyrinogen IX dehydrogenase [menaquinone]	hemG	NaN	NaN	NaN	6.28818
P0ACE0	P0ACE0	Hydrogenase-2 large chain	hybC	NaN	NaN	NaN	5.77139
P0ACI0	P0ACI0	Right origin-binding protein	rob	NaN	NaN	NaN	6.07365
P0ACI6	P0ACI6	Regulatory protein AsnC	asnC	NaN	NaN	NaN	7.23047
P0ACJ0	P0ACJ0	Leucine-responsive regulatory protein	lrp	NaN	NaN	NaN	6.37605
P0ACN4	P0ACN4	HTH-type transcriptional repressor AllR	allR	NaN	NaN	NaN	6.40324
P0AD24	P0AD24	UPF0352 protein YejL	yejL	NaN	NaN	NaN	6.56657
P0AD33	P0AD33	UPF0381 protein YfcZ	yfcZ	NaN	NaN	NaN	7.70025
P0AD57	P0AD57	Octaprenyl-diphosphate synthase	ispB	NaN	NaN	NaN	5.55693
P0ADA3	P0ADA3	Murein hydrolase activator NlpD	nlpD	NaN	NaN	NaN	6.17146
P0ADA5	P0ADA5	Uncharacterized lipoprotein YajG	yajG	NaN	NaN	NaN	8.40652
P0ADB1	P0ADB1	Osmotically-inducible lipoprotein E	osmE	NaN	NaN	NaN	7.31517
P0ADB7	P0ADB7	Entericidin B	ecnB	NaN	NaN	NaN	7.09251
P0ADC1	P0ADC1	LPS-assembly lipoprotein LptE	lptE	NaN	NaN	NaN	6.01645
P0ADC6	P0ADC6	Lipopolysaccharide export system permease protein LptG	lptG	NaN	NaN	NaN	5.65141
P0ADE6	P0ADE6	Uncharacterized protein YgaU	ygaU	NaN	NaN	NaN	5.93299
P0ADE8	P0ADE8	tRNA-modifying protein YgfZ	ygfZ	NaN	NaN	NaN	6.70763
P0ADK0	P0ADK0	Uncharacterized protein YiaF	yiaF	NaN	NaN	NaN	7.2388
P0ADN6	P0ADN6	Uncharacterized lipoprotein YifL	yifL	NaN	NaN	NaN	6.66627
P0ADY1	P0ADY1	Peptidyl-prolyl cis-trans isomerase D	ppiD	NaN	NaN	NaN	7.052
P0AE39	P0AE39	Transcriptional regulatory protein YpdB	ypdB	NaN	NaN	NaN	5.65383
P0AEB2	P0AEB2	D-alanyl-D-alanine carboxypeptidase DacA	dacA	NaN	NaN	NaN	7.30722
P0AEC3	P0AEC3	Aerobic respiration control sensor protein ArcB	arcB	NaN	NaN	NaN	5.62562
P0AED0	P0AED0	Universal stress protein A	uspA	NaN	NaN	NaN	8.6691
P0AED5	P0AED5	Response regulator UvrY	uvrY	NaN	NaN	NaN	6.22809
P0AED9	P0AED9	DNA-cytosine methyltransferase	dcm	NaN	NaN	NaN	6.23459
P0AEH5	P0AEH5	Protein ElaB	elaB	NaN	NaN	NaN	6.88047
P0AEK2	P0AEK2	3-oxoacyl-[acyl-carrier-protein] reductase FabG	fabG	NaN	NaN	NaN	7.91218
P0AEN1	P0AEN1	NAD(P)H-flavin reductase	fre	NaN	NaN	NaN	6.23555
P0AEP3	P0AEP3	UTP--glucose-1-phosphate uridylyltransferase	galU	NaN	NaN	NaN	7.02086
P0AER0	P0AER0	Glycerol uptake facilitator protein	glpF	NaN	NaN	NaN	6.72709
P0AES4	P0AES4	DNA gyrase subunit A	gyrA	NaN	NaN	NaN	5.87269
P0AEX3	P0AEX3	Alpha-ketoglutarate permease	kgtP	NaN	NaN	NaN	5.99262
P0AF12	P0AF12	5-methylthioadenosine/S-adenosylhomocysteine nucleosidase	mtnN	NaN	NaN	NaN	7.01161
P0AF20	P0AF20	N-acetylglucosamine repressor	nagC	NaN	NaN	NaN	5.9847
P0AF24	P0AF24	Ribonucleotide monophosphatase NagD	nagD	NaN	NaN	NaN	5.92936
P0AF28	P0AF28	Nitrate/nitrite response regulator protein NarL	narL	NaN	NaN	NaN	6.5498
P0AF50	P0AF50	Uncharacterized protein YjbR	yjbR	NaN	NaN	NaN	6.88221
P0AFG6	P0AFG6	Dihydrolipoyllysine-residue succinyltransferase component of 2-oxoglutarate dehydrogenase complex	sucB	NaN	NaN	NaN	7.21211
P0AFH6	P0AFH6	Oligopeptide transport system permease protein OppC	oppC	NaN	NaN	NaN	6.76788
P0AFI2	P0AFI2	DNA topoisomerase 4 subunit A	parC	NaN	NaN	NaN	6.01334
P0AFK0	P0AFK0	Metalloprotease PmbA	pmbA	NaN	NaN	NaN	6.53944			Metalloprotease involved in CcdA degradation.
P0AFR4	P0AFR4	Uncharacterized protein YciO	yciO	NaN	NaN	NaN	6.08368
P0AG00	P0AG00	Lipopolysaccharide biosynthesis protein WzzE	wzzE	NaN	NaN	NaN	5.27688
P0AG14	P0AG14	Probable protease SohB	sohB	NaN	NaN	NaN	6.06228			It is possibly a protease, not essential for bacterial viability.Serine-type endopeptidase activity
P0AG20	P0AG20	GTP pyrophosphokinase	relA	NaN	NaN	NaN	5.25178
P0AG24	P0AG24	Bifunctional (p)ppGpp synthase/hydrolase SpoT;GTP pyrophosphokinase;Guanosine-3,5-bis(diphosphate) 3-pyrophosphohydrolase	spoT	NaN	NaN	NaN	6.50687
P0AG51	P0AG51	50S ribosomal protein L30	rpmD	NaN	NaN	NaN	6.96214
P0AGB0	P0AGB0	Phosphoserine phosphatase	serB	NaN	NaN	NaN	5.28137
P0AGB6	P0AGB6	ECF RNA polymerase sigma-E factor	rpoE	NaN	NaN	NaN	NaN
P0AGD7	P0AGD7	Signal recognition particle protein	ffh	NaN	NaN	NaN	6.62866
P0AGG0	P0AGG0	Thiamine-monophosphate kinase	thiL	NaN	NaN	NaN	5.60942
P0AGJ5	P0AGJ5	Uncharacterized tRNA/rRNA methyltransferase YfiF	yfiF	NaN	NaN	NaN	5.80019
P0C0R7	P0C0R7	Ribosomal RNA large subunit methyltransferase E	rlmE	NaN	NaN	NaN	6.19937
P0C0S1	P0C0S1	Small-conductance mechanosensitive channel	mscS	NaN	NaN	NaN	5.87727
P0C8J8	P0C8J8	D-tagatose-1,6-bisphosphate aldolase subunit GatZ	gatZ	NaN	NaN	NaN	6.49227
P0CK95	P0CK95	Putative lipoprotein AcfD homolog	yghJ	NaN	NaN	NaN	5.8732
P0DMC7	P0DMC7	Transcriptional regulatory protein RcsB	rcsB	NaN	NaN	NaN	6.53844
P10100	P10100	Rare lipoprotein A	rlpA	NaN	NaN	NaN	6.87195
P10408	P10408	Protein translocase subunit SecA	secA	NaN	NaN	NaN	7.02588
P10441	P10441	Lipid-A-disaccharide synthase	lpxB	NaN	NaN	NaN	5.91534
P11880	P11880	UDP-N-acetylmuramoyl-tripeptide--D-alanyl-D-alanine ligase	murF	NaN	NaN	NaN	6.3843
P12282	P12282	Molybdopterin-synthase adenylyltransferase	moeB	NaN	NaN	NaN	5.73373
P13024	P13024	Protein FdhE	fdhE	NaN	NaN	NaN	5.58581
P13445	P13445	RNA polymerase sigma factor RpoS	rpoS	NaN	NaN	NaN	7.61413
P15042	P15042	DNA ligase	ligA	NaN	NaN	NaN	5.20553
P15254	P15254	Phosphoribosylformylglycinamidine synthase	purL	NaN	NaN	NaN	5.31643
P15639	P15639	Bifunctional purine biosynthesis protein PurH;Phosphoribosylaminoimidazolecarboxamide formyltransferase;IMP cyclohydrolase	purH	NaN	NaN	NaN	6.38643
P15877	P15877	Quinoprotein glucose dehydrogenase	gcd	NaN	NaN	NaN	6.55208
P16676	P16676	Sulfate/thiosulfate import ATP-binding protein CysA	cysA	NaN	NaN	NaN	6.46073
P17854	P17854	Phosphoadenosine phosphosulfate reductase	cysH	NaN	NaN	NaN	6.69308
P21507	P21507	ATP-dependent RNA helicase SrmB	srmB	NaN	NaN	NaN	5.88207
P21829	P21829	Pyridoxal phosphate phosphatase YbhA	ybhA	NaN	NaN	NaN	7.52638
P22106	P22106	Asparagine synthetase B [glutamine-hydrolyzing]	asnB	NaN	NaN	NaN	6.88786
P22523	P22523	Chromosome partition protein MukB	mukB	NaN	NaN	NaN	6.76701
P22939	P22939	Farnesyl diphosphate synthase	ispA	NaN	NaN	NaN	6.27344
P23003	P23003	tRNA/tmRNA (uracil-C(5))-methyltransferase	trmA	NaN	NaN	NaN	5.96097
P23367	P23367	DNA mismatch repair protein MutL	mutL	NaN	NaN	NaN	5.33923
P23827	P23827	Ecotin	eco	NaN	NaN	NaN	5.76108
P23830	P23830	CDP-diacylglycerol--serine O-phosphatidyltransferase	pssA	NaN	NaN	NaN	7.1651
P23893	P23893	Glutamate-1-semialdehyde 2,1-aminomutase	hemL	NaN	NaN	NaN	6.75998
P24203	P24203	Uncharacterized GTP-binding protein YjiA	yjiA	NaN	NaN	NaN	6.3575
P24207	P24207	Phenylalanine-specific permease	pheP	NaN	NaN	NaN	5.91676
P24252	P24252	Uncharacterized protein YbgA	ybgA	NaN	NaN	NaN	5.67389
P24255	P24255	RNA polymerase sigma-54 factor	rpoN	NaN	NaN	NaN	5.6644
P25397	P25397	Tellurite methyltransferase	tehB	NaN	NaN	NaN	6.11624
P25437	P25437	S-(hydroxymethyl)glutathione dehydrogenase	frmA	NaN	NaN	NaN	5.58439
P25522	P25522	tRNA modification GTPase MnmE	mnmE	NaN	NaN	NaN	5.54631
P25742	P25742	Lipopolysaccharide core heptosyltransferase RfaQ	rfaQ	NaN	NaN	NaN	5.97848
P25894	P25894	Metalloprotease LoiP	loiP	NaN	NaN	NaN	5.63786			Metalloprotease that cleaves substrates preferentially between Phe-Phe residues.
P27240	P27240	Lipopolysaccharide core heptose(II) kinase RfaY	rfaY	NaN	NaN	NaN	6.77216
P27242	P27242	Lipopolysaccharide 1,2-N-acetylglucosaminetransferase	waaU	NaN	NaN	NaN	5.474
P27434	P27434	Cytoskeleton protein RodZ	rodZ	NaN	NaN	NaN	7.08728
P28635	P28635	D-methionine-binding lipoprotein MetQ	metQ	NaN	NaN	NaN	5.85988
P29745	P29745	Peptidase T	pepT	NaN	NaN	NaN	5.82955
P30011	P30011	Nicotinate-nucleotide pyrophosphorylase [carboxylating]	nadC	NaN	NaN	NaN	5.81004
P31063	P31063	Uncharacterized lipoprotein YedD	yedD	NaN	NaN	NaN	6.53344
P31433	P31433	Uncharacterized protein YicH	yicH	NaN	NaN	NaN	5.30756
P31441	P31441	Adenine deaminase	ade	NaN	NaN	NaN	5.24753
P31658	P31658	Molecular chaperone Hsp31 and glyoxalase 3	hchA	NaN	NaN	NaN	7.16593
P31677	P31677	Alpha,alpha-trehalose-phosphate synthase [UDP-forming]	otsA	NaN	NaN	NaN	NaN
P31678	P31678	Trehalose-6-phosphate phosphatase	otsB	NaN	NaN	NaN	5.51992
P31979	P31979	NADH-quinone oxidoreductase subunit F	nuoF	NaN	NaN	NaN	6.91851
P32131	P32131	Oxygen-independent coproporphyrinogen-III oxidase	hemN	NaN	NaN	NaN	5.91462
P32162	P32162	UPF0381 protein YiiS	yiiS	NaN	NaN	NaN	6.46036
P32176;P24183	P32176	Formate dehydrogenase-O major subunit	fdoG	NaN	NaN	NaN	6.47751
P33599	P33599	NADH-quinone oxidoreductase subunit C/D	nuoC	NaN	NaN	NaN	7.10877
P33916	P33916	Uncharacterized ABC transporter ATP-binding protein YejF	yejF	NaN	NaN	NaN	6.51854
P33940	P33940	Malate:quinone oxidoreductase	mqo	NaN	NaN	NaN	5.61361
P36659	P36659	Curved DNA-binding protein	cbpA	NaN	NaN	NaN	6.07715
P36667	P36667	Rhamnosyltransferase WbbL	wbbL	NaN	NaN	NaN	6.48337
P36680	P36680	Cell division protein ZapD	zapD	NaN	NaN	NaN	6.20539
P36767	P36767	Recombination-associated protein RdgC	rdgC	NaN	NaN	NaN	6.80573
P36929	P36929	Ribosomal RNA small subunit methyltransferase B	rsmB	NaN	NaN	NaN	5.88925
P36979	P36979	Dual-specificity RNA methyltransferase RlmN	rlmN	NaN	NaN	NaN	6.18253
P37052	P37052	UPF0225 protein YchJ	ychJ	NaN	NaN	NaN	6.56367
P37194	P37194	Outer membrane protein slp	slp	NaN	NaN	NaN	NaN
P37626	P37626	Uncharacterized protein YhiI	yhiI	NaN	NaN	NaN	6.02967
P37636	P37636	Multidrug resistance protein MdtE	mdtE	NaN	NaN	NaN	5.91521
P37647	P37647	2-dehydro-3-deoxygluconokinase	kdgK	NaN	NaN	NaN	7.78634
P37648	P37648	Protein YhjJ	yhjJ	NaN	NaN	NaN	5.86421
P37665	P37665	Probable lipoprotein YiaD	yiaD	NaN	NaN	NaN	6.16693
P37689	P37689	2,3-bisphosphoglycerate-independent phosphoglycerate mutase	gpmI	NaN	NaN	NaN	5.54195
P37749	P37749	Beta-1,6-galactofuranosyltransferase WbbI	wbbI	NaN	NaN	NaN	6.57671
P37750	P37750	Putative lipopolysaccharide biosynthesis O-acetyl transferase WbbJ	wbbJ	NaN	NaN	NaN	NaN
P37751	P37751	Putative glycosyltransferase WbbK	wbbK	NaN	NaN	NaN	6.33776
P37769	P37769	2-dehydro-3-deoxy-D-gluconate 5-dehydrogenase	kduD	NaN	NaN	NaN	7.37769
P38489	P38489	Oxygen-insensitive NAD(P)H nitroreductase	nfsB	NaN	NaN	NaN	5.2847
P39172	P39172	High-affinity zinc uptake system protein ZnuA	znuA	NaN	NaN	NaN	6.15165
P39286	P39286	Putative ribosome biogenesis GTPase RsgA	rsgA	NaN	NaN	NaN	5.86054
P39337	P39337	Uncharacterized N-acetyltransferase YjgM	yjgM	NaN	NaN	NaN	NaN
P39838	P39838	Phosphotransferase RcsD	rcsD	NaN	NaN	NaN	5.98902
P41407	P41407	FMN-dependent NADH-azoreductase	azoR	NaN	NaN	NaN	6.51194
P42641	P42641	GTPase ObgE/CgtA	obgE	NaN	NaN	NaN	5.74221
P43329	P43329	ATP-dependent RNA helicase HrpA	hrpA	NaN	NaN	NaN	5.61396
P45577	P45577	RNA chaperone ProQ	proQ	NaN	NaN	NaN	6.13478
P46118	P46118	HTH-type transcriptional regulator HexR	hexR	NaN	NaN	NaN	5.7931
P46125	P46125	Inner membrane protein YedI	yedI	NaN	NaN	NaN	5.54449
P46130	P46130	Putative acyl-CoA thioester hydrolase YbhC	ybhC	NaN	NaN	NaN	6.44798
P46889	P46889	DNA translocase FtsK	ftsK	NaN	NaN	NaN	5.12917
P50465	P50465	Endonuclease 8	nei	NaN	NaN	NaN	5.49016
P60390	P60390	Ribosomal RNA small subunit methyltransferase H	rsmH	NaN	NaN	NaN	6.16894
P60757	P60757	ATP phosphoribosyltransferase	hisG	NaN	NaN	NaN	6.50424
P62517	P62517	Glucans biosynthesis glucosyltransferase H	mdoH	NaN	NaN	NaN	6.04669
P62623	P62623	4-hydroxy-3-methylbut-2-enyl diphosphate reductase	ispH	NaN	NaN	NaN	5.82209
P63389	P63389	Uncharacterized ABC transporter ATP-binding protein YheS	yheS	NaN	NaN	NaN	5.4325
P64429	P64429	Uncharacterized protein YpfJ	ypfJ	NaN	NaN	NaN	6.11358
P64581	P64581	Uncharacterized protein YqjD	yqjD	NaN	NaN	NaN	7.3439
P64604	P64604	Probable phospholipid ABC transporter-binding protein MlaD	mlaD	NaN	NaN	NaN	6.75035
P68919	P68919	50S ribosomal protein L25	rplY	NaN	NaN	NaN	7.3886
P69228	P69228	Transcriptional regulatory protein BaeR	baeR	NaN	NaN	NaN	5.68207
P69411	P69411	Outer membrane lipoprotein RcsF	rcsF	NaN	NaN	NaN	7.01149
P69425	P69425	Sec-independent protein translocase protein TatB	tatB	NaN	NaN	NaN	6.34408
P69441	P69441	Adenylate kinase	adk	NaN	NaN	NaN	6.49958
P69783	P69783	Glucose-specific phosphotransferase enzyme IIA component	crr	NaN	NaN	NaN	6.63278
P69786	P69786	PTS system glucose-specific EIICB component;Glucose permease IIC component;Glucose-specific phosphotransferase enzyme IIB component	ptsG	NaN	NaN	NaN	5.57037
P69797	P69797	PTS system mannose-specific EIIAB component;Mannose-specific phosphotransferase enzyme IIA component;Mannose-specific phosphotransferase enzyme IIB component	manX	NaN	NaN	NaN	6.62605
P69874	P69874	Spermidine/putrescine import ATP-binding protein PotA	potA	NaN	NaN	NaN	5.55668
P69924	P69924	Ribonucleoside-diphosphate reductase 1 subunit beta	nrdB	NaN	NaN	NaN	6.32987
P75728	P75728	2-octaprenyl-3-methyl-6-methoxy-1,4-benzoquinol hydroxylase	ubiF	NaN	NaN	NaN	5.40615
P75777	P75777	UPF0194 membrane protein YbhG	ybhG	NaN	NaN	NaN	5.76592
P75782	P75782	Ribosomal RNA large subunit methyltransferase F	rlmF	NaN	NaN	NaN	5.88699
P75829	P75829	Uncharacterized protein YbjX	ybjX	NaN	NaN	NaN	6.63497
P75864	P75864	Ribosomal RNA large subunit methyltransferase K/L;23S rRNA m2G2445 methyltransferase;23S rRNA m7G2069 methyltransferase	rlmL	NaN	NaN	NaN	5.9137
P75915	P75915	Chaperone protein YcdY	ycdY	NaN	NaN	NaN	7.1246
P76027	P76027	Oligopeptide transport ATP-binding protein OppD	oppD	NaN	NaN	NaN	6.72142
P76035	P76035	Uncharacterized protein YciW	yciW	NaN	NaN	NaN	5.92921
P76055	P76055	tRNA 2-thiocytidine biosynthesis protein TtcA	ttcA	NaN	NaN	NaN	6.46835
P76177	P76177	Protein YdgH	ydgH	NaN	NaN	NaN	6.52476
P76237	P76237	Putative diguanylate cyclase YeaJ	yeaJ	NaN	NaN	NaN	5.46315
P76245	P76245	Probable diguanylate cyclase YeaP	yeaP	NaN	NaN	NaN	5.94014
P76290	P76290	tRNA (cmo5U34)-methyltransferase	cmoA	NaN	NaN	NaN	5.90619
P76372	P76372	Chain length determinant protein	wzzB	NaN	NaN	NaN	6.91783
P76397	P76397	Multidrug resistance protein MdtA	mdtA	NaN	NaN	NaN	5.35723
P76403	P76403	Uncharacterized protease YegQ	yegQ	NaN	NaN	NaN	6.24294			Uncharacterized protease YegQ
P76502	P76502	Phosphohistidine phosphatase SixA	sixA	NaN	NaN	NaN	6.26989
P76536	P76536	Probable deferrochelatase/peroxidase YfeX	yfeX	NaN	NaN	NaN	5.94509
P76576	P76576	UPF0070 protein YfgM	yfgM	NaN	NaN	NaN	7.09465
P76658	P76658	Bifunctional protein HldE;D-beta-D-heptose 7-phosphate kinase;D-beta-D-heptose 1-phosphate adenylyltransferase	hldE	NaN	NaN	NaN	6.67224
P77307	P77307	Probable iron export permease protein FetB	fetB	NaN	NaN	NaN	5.55463
P77529	P77529	Uncharacterized symporter YdjN	ydjN	NaN	NaN	NaN	7.36661
P77552	P77552	Uncharacterized protein YdhQ	ydhQ	NaN	NaN	NaN	5.41639
P77717	P77717	Uncharacterized lipoprotein YbaY	ybaY	NaN	NaN	NaN	6.58863
P77735	P77735	Uncharacterized oxidoreductase YajO	yajO	NaN	NaN	NaN	5.81634
P77756	P77756	7-cyano-7-deazaguanine synthase	queC	NaN	NaN	NaN	6.43181
P77774	P77774	Outer membrane protein assembly factor BamB	bamB	NaN	NaN	NaN	6.53836
P77775	P77775	Epimerase family protein YfcH	yfcH	NaN	NaN	NaN	5.54401
P77804	P77804	Protein YdgA	ydgA	NaN	NaN	NaN	6.92849
Q46868	Q46868	Uncharacterized protein YqiC	yqiC	NaN	NaN	NaN	6.3665
Q46938	Q46938	4-deoxy-L-threo-5-hexosulose-uronate ketol-isomerase	kduI	NaN	NaN	NaN	6.60708
In yellow, proteases/peptidases are highlighted only present in YcgC by Tu et al., and neither in YcgC S200A from Tu et al. nor in YcgC prepared in our lab.
