# Supplementary material for: Comment on ‘YcgC represents a new protein deacetylase family in prokaryotes’
Source: eLife. 2018 Jun 25;7:e37798. doi: 10.7554/eLife.37798 (PMC6023612; doi:10.7554/eLife.37798)
Supplement: Supplementary file 3. — We observed an overall sequence coverage of almost 93%. The only sequences not identified were 8-TTGKRSRAVSAK-19 and 100-LK-101, most likely because trypsin cleavage generates small peptides not detected by LC-MS/MS. As a result, this shows that there is no acetylation occurring at those lysines. [file elife-37798-supp3.xlsx]

## Sheet: proteins
T: Protein IDs	T: Majority protein IDs	T: Protein names	T: Gene names	iBAQ (log10)	N: Mol. weight [kDa]
P00957	P00957	Alanine--tRNA ligase	alaS	NaN	96.031
P0A7S9	P0A7S9	30S ribosomal protein S13	rpsM	NaN	13.099
P0A7V8	P0A7V8	30S ribosomal protein S4	rpsD	NaN	23.469
P0ABZ6	P0ABZ6	Chaperone SurA	surA	NaN	47.283
P0ADY3	P0ADY3	50S ribosomal protein L14	rplN	NaN	13.541
P76372	P76372	Chain length determinant protein	wzzB	NaN	36.454
P0ACU2;CON__sp|P0ACU2|His-RUTR_ECOLI;Lammers_RutR_WT_Tu	P0ACU2;CON__sp|P0ACU2|His-RUTR_ECOLI;Lammers_RutR_WT_Tu	HTH-type transcriptional regulator RutR	rutR	10.6681	23.687
P0A9K9	P0A9K9	FKBP-type peptidyl-prolyl cis-trans isomerase SlyD	slyD	9.03559	20.853
P0ADZ4	P0ADZ4	30S ribosomal protein S15	rpsO	8.82807	10.269
P0A6Y8	P0A6Y8	Chaperone protein DnaK	dnaK	8.71079	69.114
P0AA25	P0AA25	Thioredoxin-1	trxA	8.38059	11.806
P75960	P75960	NAD-dependent protein deacylase	cobB	8.28778	31.464
P0A9A9	P0A9A9	Ferric uptake regulation protein	fur	8.26193	16.795
P0AA43	P0AA43	Ribosomal small subunit pseudouridine synthase A	rsuA	8.25753	25.865
P0AG59	P0AG59	30S ribosomal protein S14	rpsN	7.92796	11.58
P0A7M2	P0A7M2	50S ribosomal protein L28	rpmB	7.90631	9.0064
P0A7S3	P0A7S3	30S ribosomal protein S12	rpsL	7.78282	13.737
P60624	P60624	50S ribosomal protein L24	rplX	7.76236	11.316
P0A7M6	P0A7M6	50S ribosomal protein L29	rpmC	7.65208	7.2734
P0A7L8	P0A7L8	50S ribosomal protein L27	rpmA	7.56104	9.1244
P0ACC3	P0ACC3	Iron-sulfur cluster insertion protein ErpA	erpA	7.48106	12.1
P0ACD4	P0ACD4	Iron-sulfur cluster assembly scaffold protein IscU	iscU	7.42014	13.848
P0A7U7	P0A7U7	30S ribosomal protein S20	rpsT	7.35845	9.6843
P64588	P64588	Transcriptional regulator YqjI	yqjI	7.19058	23.401
P0A7M9	P0A7M9	50S ribosomal protein L31	rpmE	7.07515	7.871
P76398	P76398	Multidrug resistance protein MdtB	mdtB	7.06104	112.08
P60438	P60438	50S ribosomal protein L3	rplC	6.98865	22.243
P0A7N9	P0A7N9	50S ribosomal protein L33	rpmG	6.9635	6.3715
P69776	P69776	Major outer membrane lipoprotein Lpp	lpp	6.82288	8.3234
P0A7J7	P0A7J7	50S ribosomal protein L11	rplK	6.73524	14.875
P0A912	P0A912	Peptidoglycan-associated lipoprotein	pal	6.72546	18.824
P0AG27	P0AG27	Uncharacterized protein YibN	yibN	6.71213	15.596
P0ABI8	P0ABI8	Cytochrome bo(3) ubiquinol oxidase subunit 1	cyoB	6.67433	74.367
P0A7W1	P0A7W1	30S ribosomal protein S5	rpsE	6.66811	17.603
P63020	P63020	Fe/S biogenesis protein NfuA	nfuA	6.66629	20.997
P0ABJ1	P0ABJ1	Cytochrome bo(3) ubiquinol oxidase subunit 2	cyoA	6.62248	34.911
P0AG55	P0AG55	50S ribosomal protein L6	rplF	6.55812	18.904
P0A910	P0A910	Outer membrane protein A	ompA	6.53515	37.2
P02358	P02358	30S ribosomal protein S6;30S ribosomal protein S6, fully modified isoform;30S ribosomal protein S6, non-modified isoform	rpsF	6.49493	15.703
P0ADZ7	P0ADZ7	UPF0092 membrane protein YajC	yajC	6.48761	11.887
P0ABA0	P0ABA0	ATP synthase subunit b	atpF	6.40632	17.264
P0A6F9	P0A6F9	10 kDa chaperonin	groS	6.36683	10.387
P0ACF8	P0ACF8	DNA-binding protein H-NS	hns	6.2408	15.539
P0A7V0	P0A7V0	30S ribosomal protein S2	rpsB	6.08045	26.743
P0AE06	P0AE06	Multidrug efflux pump subunit AcrA	acrA	6.0304	42.196
P60422	P60422	50S ribosomal protein L2	rplB	5.81423	29.86
P76270	P76270	Free methionine-R-sulfoxide reductase	msrC	5.79156	18.121
P0AG67	P0AG67	30S ribosomal protein S1	rpsA	5.66082	61.157
P17169	P17169	Glutamine--fructose-6-phosphate aminotransferase [isomerizing]	glmS	5.64155	66.894
P0A850	P0A850	Trigger factor	tig	5.59198	48.192
P0A7V3	P0A7V3	30S ribosomal protein S3	rpsC	5.58916	25.983
P0AEE1	P0AEE1	Protein DcrB	dcrB	5.48517	19.787
P0AB71	P0AB71	Fructose-bisphosphate aldolase class 2	fbaA	5.41323	39.147
P0A6A3	P0A6A3	Acetate kinase	ackA	5.3234	43.29
P0AC33;P14407	P0AC33;P14407	Fumarate hydratase class I, aerobic;Fumarate hydratase class I, anaerobic	fumA;fumB	5.29905	60.298
P0A9P0	P0A9P0	Dihydrolipoyl dehydrogenase	lpdA	5.27026	50.688
P36683	P36683	Aconitate hydratase B	acnB	4.80537	93.497
P0A6W9	P0A6W9	Glutamate--cysteine ligase	gshA	4.69742	58.269

## Sheet: peptides
Intensity	C: Modifications	N: Mass	T: Sequence	T: Proteins	T: Gene Names	T: Protein Names	M: Protein group IDs	M: Acetyl (K) site IDs	Acetylation Site
51305000000		1447.78	AFREDFAPLAAIK	P0ACU2;CON__sp|P0ACU2|His-RUTR_ECOLI;Lammers_RutR_WT_Tu	rutR	HTH-type transcriptional regulator RutR	56
3292500000		2009.07	AFREDFAPLAAIKEYIR	P0ACU2;CON__sp|P0ACU2|His-RUTR_ECOLI;Lammers_RutR_WT_Tu	rutR	HTH-type transcriptional regulator RutR	56
250070000	Acetyl (K)	2051.08	AFREDFAPLAAIKEYIR	P0ACU2;CON__sp|P0ACU2|His-RUTR_ECOLI;Lammers_RutR_WT_Tu	rutR	HTH-type transcriptional regulator RutR	56	2	AcK95
81728000000		2038.03	AILSAALDTFSQFGFHGTR	P0ACU2;CON__sp|P0ACU2|His-RUTR_ECOLI;Lammers_RutR_WT_Tu	rutR	HTH-type transcriptional regulator RutR	56
3130300000		3276.71	AILSAALDTFSQFGFHGTRLEQIAELAGVSK	P0ACU2;CON__sp|P0ACU2|His-RUTR_ECOLI;Lammers_RutR_WT_Tu	rutR	HTH-type transcriptional regulator RutR	56
697180000		1612.92	ALIDEKSALIAGWVK	P0ACU2;CON__sp|P0ACU2|His-RUTR_ECOLI;Lammers_RutR_WT_Tu	rutR	HTH-type transcriptional regulator RutR	56
343490000		1885.07	ALIDEKSALIAGWVKSGK	P0ACU2;CON__sp|P0ACU2|His-RUTR_ECOLI;Lammers_RutR_WT_Tu	rutR	HTH-type transcriptional regulator RutR	56
16267000000		1723.82	DEVFFNQTVENVQR	P0ACU2;CON__sp|P0ACU2|His-RUTR_ECOLI;Lammers_RutR_WT_Tu	rutR	HTH-type transcriptional regulator RutR	56
1211400000		2771.47	DEVFFNQTVENVQRIIIEGIRPR	P0ACU2;CON__sp|P0ACU2|His-RUTR_ECOLI;Lammers_RutR_WT_Tu	rutR	HTH-type transcriptional regulator RutR	56
48629000000		835.382	DYPQASR	P0ACU2;CON__sp|P0ACU2|His-RUTR_ECOLI;Lammers_RutR_WT_Tu	rutR	HTH-type transcriptional regulator RutR	56
17156000000		1046.61	EALYIAVLR	P0ACU2;CON__sp|P0ACU2|His-RUTR_ECOLI;Lammers_RutR_WT_Tu	rutR	HTH-type transcriptional regulator RutR	56
0		2337.38	EALYIAVLRQILDIWLAPLK	P0ACU2;CON__sp|P0ACU2|His-RUTR_ECOLI;Lammers_RutR_WT_Tu	rutR	HTH-type transcriptional regulator RutR	56
0		2711.59	EALYIAVLRQILDIWLAPLKAFR	P0ACU2;CON__sp|P0ACU2|His-RUTR_ECOLI;Lammers_RutR_WT_Tu	rutR	HTH-type transcriptional regulator RutR	56
47385000000		1073.58	EDFAPLAAIK	P0ACU2;CON__sp|P0ACU2|His-RUTR_ECOLI;Lammers_RutR_WT_Tu	rutR	HTH-type transcriptional regulator RutR	56
1094400000		1634.87	EDFAPLAAIKEYIR	P0ACU2;CON__sp|P0ACU2|His-RUTR_ECOLI;Lammers_RutR_WT_Tu	rutR	HTH-type transcriptional regulator RutR	56
116300000	Acetyl (K)	1676.88	EDFAPLAAIKEYIR	P0ACU2;CON__sp|P0ACU2|His-RUTR_ECOLI;Lammers_RutR_WT_Tu	rutR	HTH-type transcriptional regulator RutR	56	2	AcK95
124560000		1404.81	EYIRLKLEVSR	P0ACU2;CON__sp|P0ACU2|His-RUTR_ECOLI;Lammers_RutR_WT_Tu	rutR	HTH-type transcriptional regulator RutR	56
1661900000		812.512	IIIEGIR	P0ACU2;CON__sp|P0ACU2|His-RUTR_ECOLI;Lammers_RutR_WT_Tu	rutR	HTH-type transcriptional regulator RutR	56
50979000000		1065.67	IIIEGIRPR	P0ACU2;CON__sp|P0ACU2|His-RUTR_ECOLI;Lammers_RutR_WT_Tu	rutR	HTH-type transcriptional regulator RutR	56
2789000000		2166.12	KAILSAALDTFSQFGFHGTR	P0ACU2;CON__sp|P0ACU2|His-RUTR_ECOLI;Lammers_RutR_WT_Tu	rutR	HTH-type transcriptional regulator RutR	56
1774100000	Acetyl (K)	2208.13	KAILSAALDTFSQFGFHGTR	P0ACU2;CON__sp|P0ACU2|His-RUTR_ECOLI;Lammers_RutR_WT_Tu	rutR	HTH-type transcriptional regulator RutR	56	3	AcK21
257810000		3404.81	KAILSAALDTFSQFGFHGTRLEQIAELAGVSK	P0ACU2;CON__sp|P0ACU2|His-RUTR_ECOLI;Lammers_RutR_WT_Tu	rutR	HTH-type transcriptional regulator RutR	56
7053700	Acetyl (K)	3446.82	KAILSAALDTFSQFGFHGTRLEQIAELAGVSK	P0ACU2;CON__sp|P0ACU2|His-RUTR_ECOLI;Lammers_RutR_WT_Tu	rutR	HTH-type transcriptional regulator RutR	56	3;4	AcK21
0	Acetyl (K)	2336.23	KKAILSAALDTFSQFGFHGTR	P0ACU2;CON__sp|P0ACU2|His-RUTR_ECOLI;Lammers_RutR_WT_Tu	rutR	HTH-type transcriptional regulator RutR	56	3;5	AcK20,21
2440500000	Oxidation (M)	4023.04	LAPIDPQHLIFMIWASTQHYADFAPQVEAVTGATLR	P0ACU2;CON__sp|P0ACU2|His-RUTR_ECOLI;Lammers_RutR_WT_Tu	rutR	HTH-type transcriptional regulator RutR	56
3506000000		4007.04	LAPIDPQHLIFMIWASTQHYADFAPQVEAVTGATLR	P0ACU2;CON__sp|P0ACU2|His-RUTR_ECOLI;Lammers_RutR_WT_Tu	rutR	HTH-type transcriptional regulator RutR	56
64180000000		1256.7	LEQIAELAGVSK	P0ACU2;CON__sp|P0ACU2|His-RUTR_ECOLI;Lammers_RutR_WT_Tu	rutR	HTH-type transcriptional regulator RutR	56
106710000	Acetyl (K)	2525.34	LEQIAELAGVSKTNLLYYFPSK	P0ACU2;CON__sp|P0ACU2|His-RUTR_ECOLI;Lammers_RutR_WT_Tu	rutR	HTH-type transcriptional regulator RutR	56	4	AcK52
20790000000		1419.71	LEVSRDYPQASR	P0ACU2;CON__sp|P0ACU2|His-RUTR_ECOLI;Lammers_RutR_WT_Tu	rutR	HTH-type transcriptional regulator RutR	56
14047000	3 Oxidation (M)	3916.87	LEVSRDYPQASRLFCMEMLAGAPLLMDELTGDLK	P0ACU2;CON__sp|P0ACU2|His-RUTR_ECOLI;Lammers_RutR_WT_Tu	rutR	HTH-type transcriptional regulator RutR	56
8974100	2 Oxidation (M)	3900.88	LEVSRDYPQASRLFCMEMLAGAPLLMDELTGDLK	P0ACU2;CON__sp|P0ACU2|His-RUTR_ECOLI;Lammers_RutR_WT_Tu	rutR	HTH-type transcriptional regulator RutR	56
113580000	Oxidation (M)	3884.88	LEVSRDYPQASRLFCMEMLAGAPLLMDELTGDLK	P0ACU2;CON__sp|P0ACU2|His-RUTR_ECOLI;Lammers_RutR_WT_Tu	rutR	HTH-type transcriptional regulator RutR	56
56904000		3868.89	LEVSRDYPQASRLFCMEMLAGAPLLMDELTGDLK	P0ACU2;CON__sp|P0ACU2|His-RUTR_ECOLI;Lammers_RutR_WT_Tu	rutR	HTH-type transcriptional regulator RutR	56
4652600000	3 Oxidation (M)	2515.17	LFCMEMLAGAPLLMDELTGDLK	P0ACU2;CON__sp|P0ACU2|His-RUTR_ECOLI;Lammers_RutR_WT_Tu	rutR	HTH-type transcriptional regulator RutR	56
5103500000	2 Oxidation (M)	2499.18	LFCMEMLAGAPLLMDELTGDLK	P0ACU2;CON__sp|P0ACU2|His-RUTR_ECOLI;Lammers_RutR_WT_Tu	rutR	HTH-type transcriptional regulator RutR	56
5279000000	Oxidation (M)	2483.18	LFCMEMLAGAPLLMDELTGDLK	P0ACU2;CON__sp|P0ACU2|His-RUTR_ECOLI;Lammers_RutR_WT_Tu	rutR	HTH-type transcriptional regulator RutR	56
5137000000		2467.19	LFCMEMLAGAPLLMDELTGDLK	P0ACU2;CON__sp|P0ACU2|His-RUTR_ECOLI;Lammers_RutR_WT_Tu	rutR	HTH-type transcriptional regulator RutR	56
4608800000		843.518	LKLEVSR	P0ACU2;CON__sp|P0ACU2|His-RUTR_ECOLI;Lammers_RutR_WT_Tu	rutR	HTH-type transcriptional regulator RutR	56
7550700000		1660.89	LKLEVSRDYPQASR	P0ACU2;CON__sp|P0ACU2|His-RUTR_ECOLI;Lammers_RutR_WT_Tu	rutR	HTH-type transcriptional regulator RutR	56
4170500000		733.379	MTQGAVK	P0ACU2	rutR	HTH-type transcriptional regulator RutR	56
10462000000		1308.78	QILDIWLAPLK	P0ACU2;CON__sp|P0ACU2|His-RUTR_ECOLI;Lammers_RutR_WT_Tu	rutR	HTH-type transcriptional regulator RutR	56
51718000000		943.549	SALIAGWVK	P0ACU2;CON__sp|P0ACU2|His-RUTR_ECOLI;Lammers_RutR_WT_Tu	rutR	HTH-type transcriptional regulator RutR	56
1183000000		1215.7	SALIAGWVKSGK	P0ACU2;CON__sp|P0ACU2|His-RUTR_ECOLI;Lammers_RutR_WT_Tu	rutR	HTH-type transcriptional regulator RutR	56
4007800000	Acetyl (K)	1257.71	SALIAGWVKSGK	P0ACU2;CON__sp|P0ACU2|His-RUTR_ECOLI;Lammers_RutR_WT_Tu	rutR	HTH-type transcriptional regulator RutR	56	6	AcK150
51696000	Oxidation (M)	4295.18	SGKLAPIDPQHLIFMIWASTQHYADFAPQVEAVTGATLR	P0ACU2;CON__sp|P0ACU2|His-RUTR_ECOLI;Lammers_RutR_WT_Tu	rutR	HTH-type transcriptional regulator RutR	56
294600000		4279.19	SGKLAPIDPQHLIFMIWASTQHYADFAPQVEAVTGATLR	P0ACU2;CON__sp|P0ACU2|His-RUTR_ECOLI;Lammers_RutR_WT_Tu	rutR	HTH-type transcriptional regulator RutR	56
48078000000		1244.64	TNLLYYFPSK	P0ACU2;CON__sp|P0ACU2|His-RUTR_ECOLI;Lammers_RutR_WT_Tu	rutR	HTH-type transcriptional regulator RutR	56
25243000		2273.25	TNLLYYFPSKEALYIAVLR	P0ACU2;CON__sp|P0ACU2|His-RUTR_ECOLI;Lammers_RutR_WT_Tu	rutR	HTH-type transcriptional regulator RutR	56
total intensity:	573738217800
	Intensity	ratio	Total ratio / (non-acetylated/aceylated peptides)	Total ratio / (acetylated/non-aceylated peptides)	Total ratio (acetylated peptides/total peptides for RutR)
	AcK95 Peptid1
non-acetylated	51305000000
non-acetylated	3292500000	218.329	281.346	0.00355434	0.0638566
sum	54597500000
acetylated	250070000
	AcK95 Peptid2
non-acetylated	47385000000
non-acetylated	1094400000	416.848
sum	48479400000
acetylated	116300000
	AcK21 Peptid 1
non-acetylated	2789000000	1.57206	1.71058	0.584596	0.310447
acetylated	1774100000
	AcK21 Peptid 2
non-acetylated	257810000	36.5496
acetylated	7053700
	AcK52
non-acetylated	64180000000	601.443	601.443	0.00166267	0.0185991
acetylated	106710000
	AcK150
non-acetylated	51718000000	13.1995	13.1995	0.0757604	0.698542
non-acetylated	1183000000
sum	52901000000
acetylated	4007800000
	K62
non-acetylated	non-acetylated	48103243000		0
				total acetylated:	0.0109144
